# Supplementary material for: Neutralization of pertussis toxin by a single antibody prevents clinical pertussis in neonatal baboons
Source: PubMed Central journal article supplement (PMC7002138; doi:10.1126/sciadv.aay9258), 2020-02-05
Supplement: aay9258_SM.pdf [file aay9258_SM.pdf]

## Supplementary Materials for

### Neutralization of pertussis toxin by a single antibody prevents clinical pertussis in neonatal baboons

Annalee W. Nguyen, Andrea M. DiVenere, James F. Papin, Sheila Connelly, Michael Kaleko, Jennifer A. Maynard\*

\*Corresponding author. Email: maynard@che.utexas.edu

Published 5 February 2020, *Sci. Adv.* **6**, eaay9258 (2020)  
DOI: 10.1126/sciadv.aay9258

#### **This PDF file includes:**

- Fig. S1. Variants of antibody 1B7 bind PTx equivalently by ELISA.
- Fig. S2. Dosing hu1B7 in the mouse challenge model.
- Fig. S3. Temporal data for WBC count and bacterial colonization for each treatment group.
- Fig. S4. Temporal correlation of anti-PTx and WBC counts for each baboon.
- Fig. S5. Temporal correlation of anti-PTx and antidrug antibody titers for each treated baboon.
- Fig. S6. Pearson correlation of antidrug antibody titers and anti-PTx titers.
- Fig. S7. Presence of 1B7 does not interfere with anti-PTx responses due to vaccination.
- Table S1. Baboon raw data.

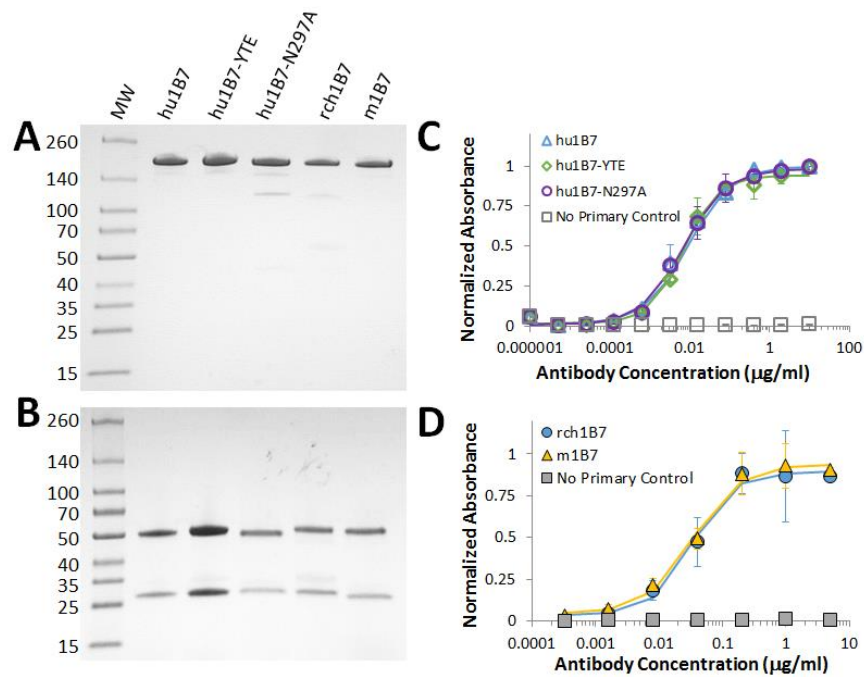

**Fig. S1. Variants of antibody 1B7 bind PTx equivalently by ELISA.** Variants of 1B7 were compared by (A) nonreducing and (B) reducing SDS-PAGE. Purified antibodies with (C) human or (D) mouse constant regions were compared for binding to a PTx coated plate by ELISA with detection by anti-human Fc or anti-mouse Fc antibodies, respectively. In (C), the average of duplicate hu1B7 data are in blue triangles, hu1B7-YTE are in green diamonds, hu1B7-N297A are in purple circles, and no primary control data are in grey squares. For (D) the average of quadruplicate rch1B7 data are in blue circles, m1B7 data are in yellow triangles, and no primary control data are in grey squares. Fits are shown as lines in the color of the data.

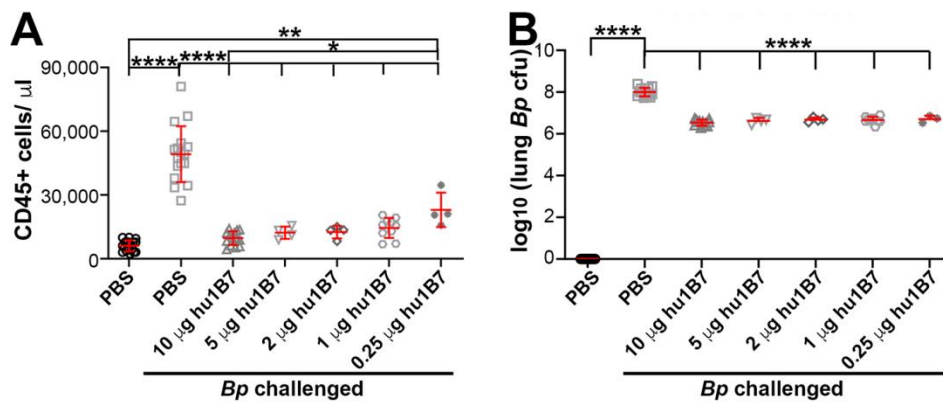

**Fig. S2. Dosing hu1B7 in the mouse challenge model.** Four-week-old Balb/c mice were administered antibody or PBS intraperitoneally in a 200  $\mu\text{l}$  volume two hours prior to infection with  $10^7$  cfu *B. pertussis* strain D420. Infection severity was assessed after seven days by (A) CD45+ leukocytosis (WBC) and (B) *B. pertussis* lung colonization (no colonies were recovered for PBS-treated, uninfected mice). Data shown were pooled from three separate experiments, each including uninfected controls and infected controls treated with PBS or 10  $\mu\text{g}$  hu1B7, with each group comprising 4-6 mice. Mean and standard deviation for each treatment are shown in red; significance was determined by two-way ANOVA with Tukey HSD with \*  $p < 0.05$ , \*\*  $p < 0.01$ , \*\*\*\*  $p < 0.0001$ .

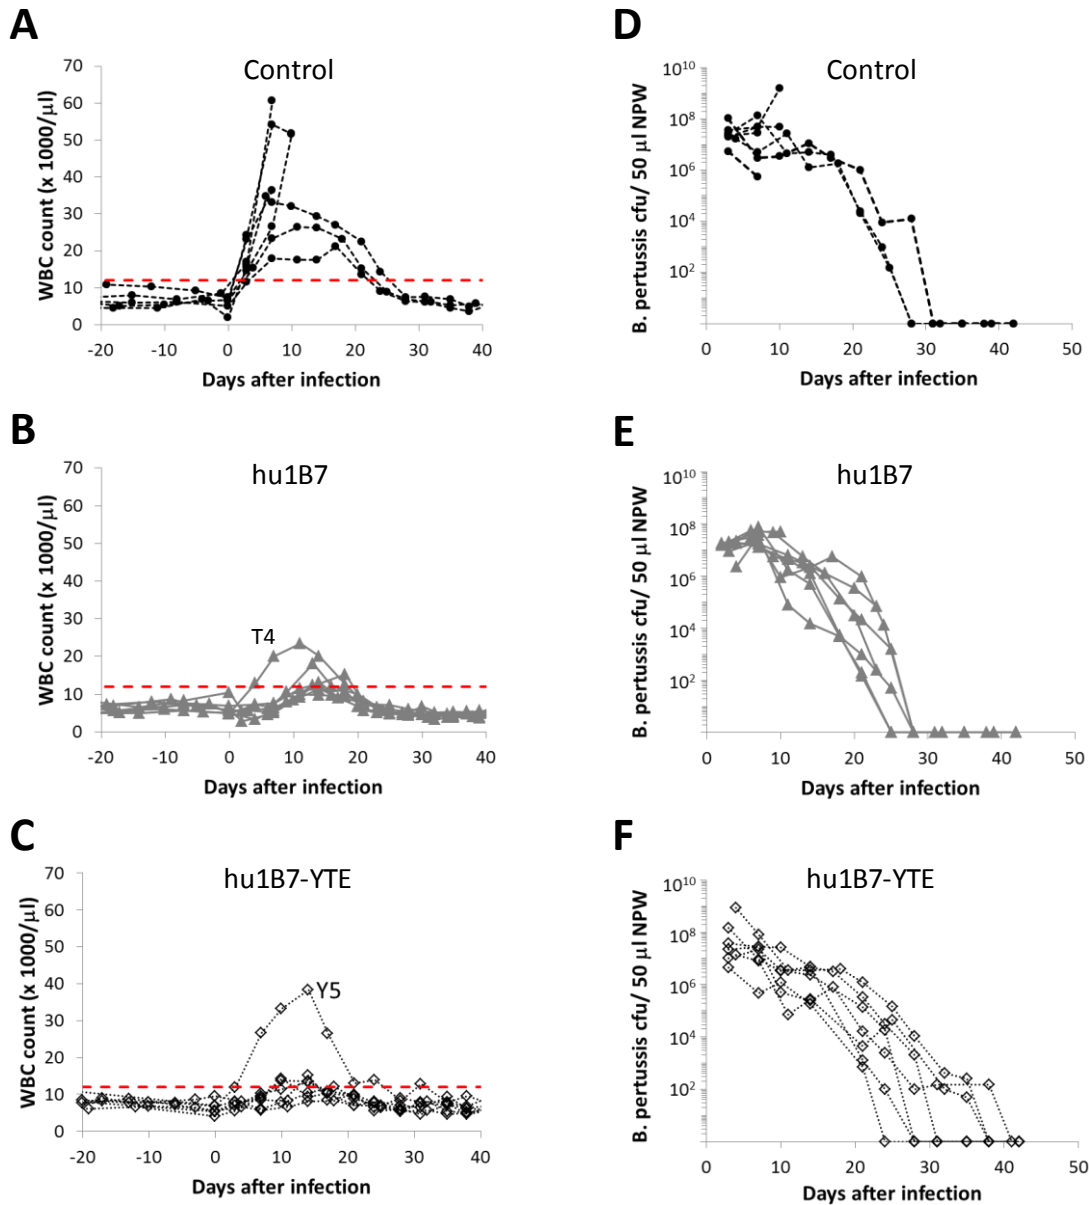

**Fig. S3. Temporal data for WBC count and bacterial colonization for each treatment group.** The WBC counts are shown for (A) control, (B) hu1B7-treated and (C) hu1B7-YTE treated animals. The dashed red line shows the 95% confidence interval for WBC variation observed before infection; WBC counts above this line are defined as elevated. The number of *B. pertussis* colonies recovered from nasopharyngeal wash fluid are shown for (D) controls, (E) hu1B7-treated and (F) hu1B7-YTE treated animals. Line and marker styles are consistent with Figure 3C in the main text.

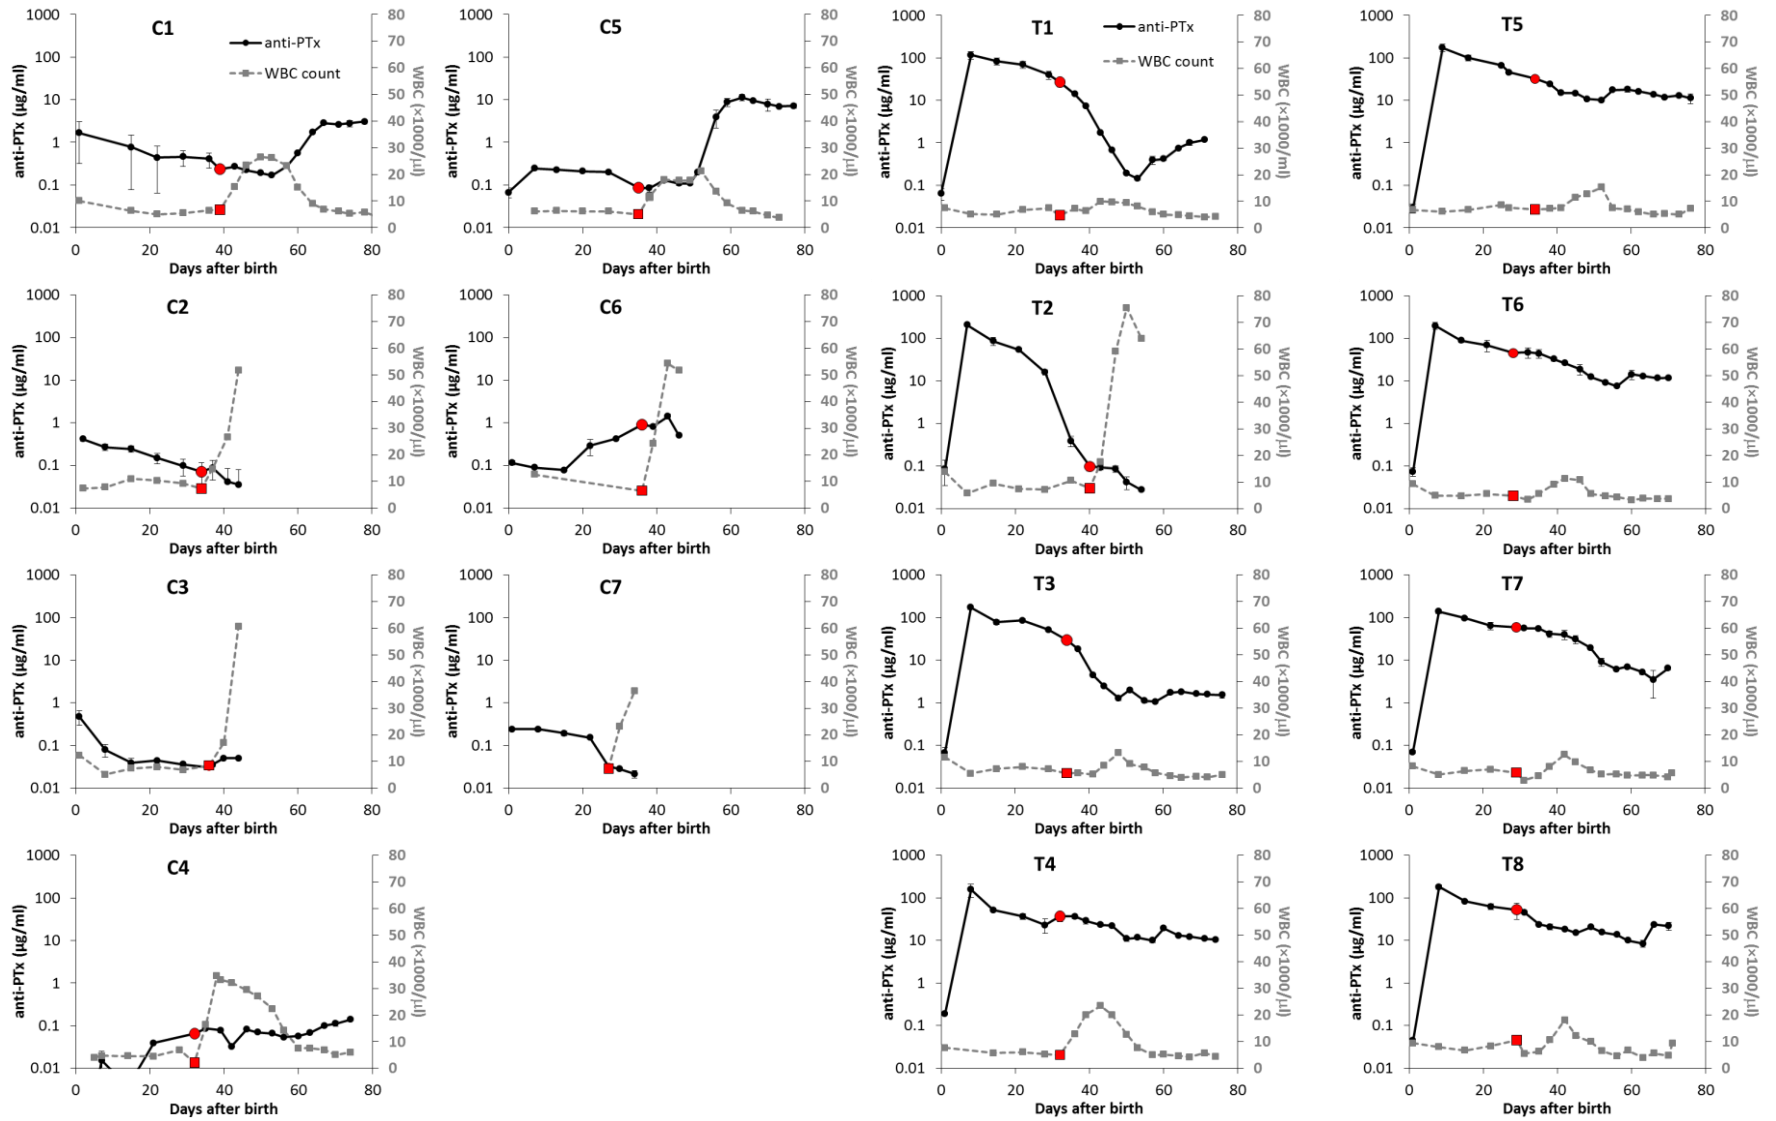

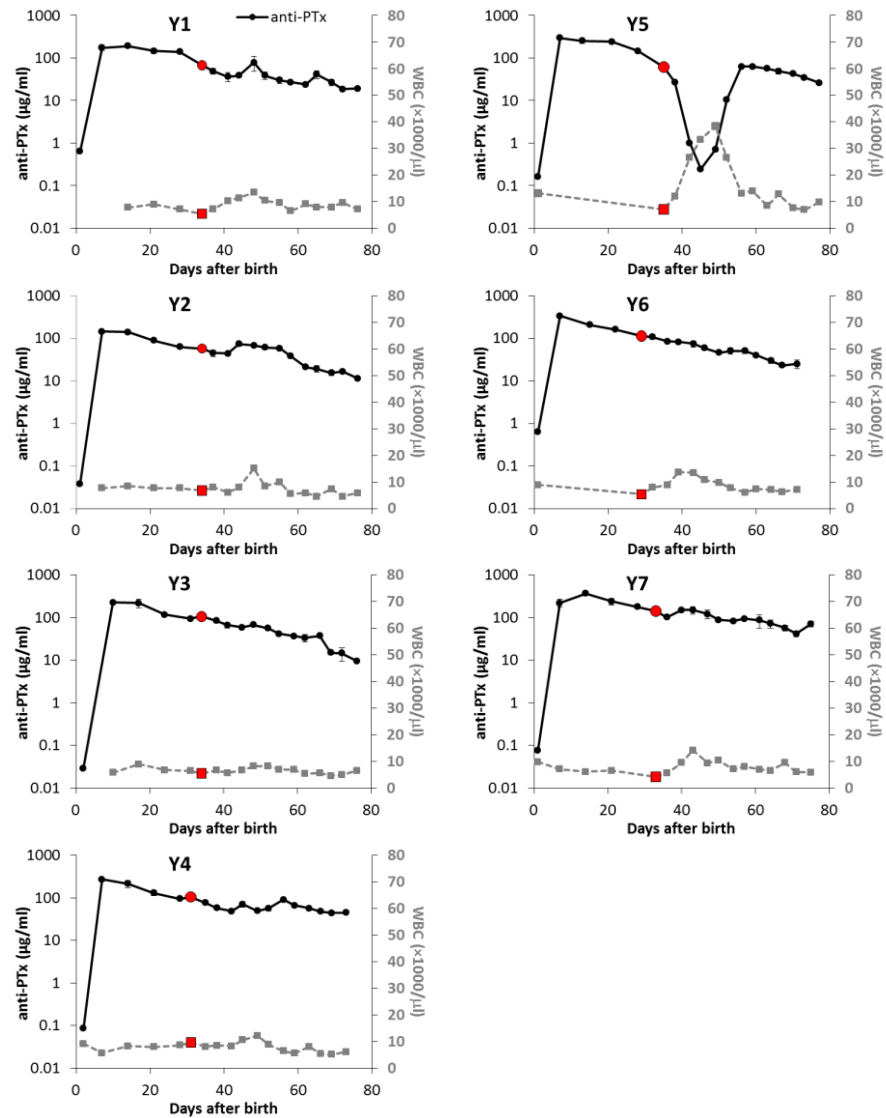

**Fig. S4. Temporal correlation of anti-PTx and WBC counts for each baboon.** Anti-PTx antibody titers were measured for each baboon (left vertical axis, black line and circles) and WBC count was determined for each point (right vertical axis, grey line and squares). In each data set, the day the baboon was infected with *B. pertussis* is identified by a red marker.

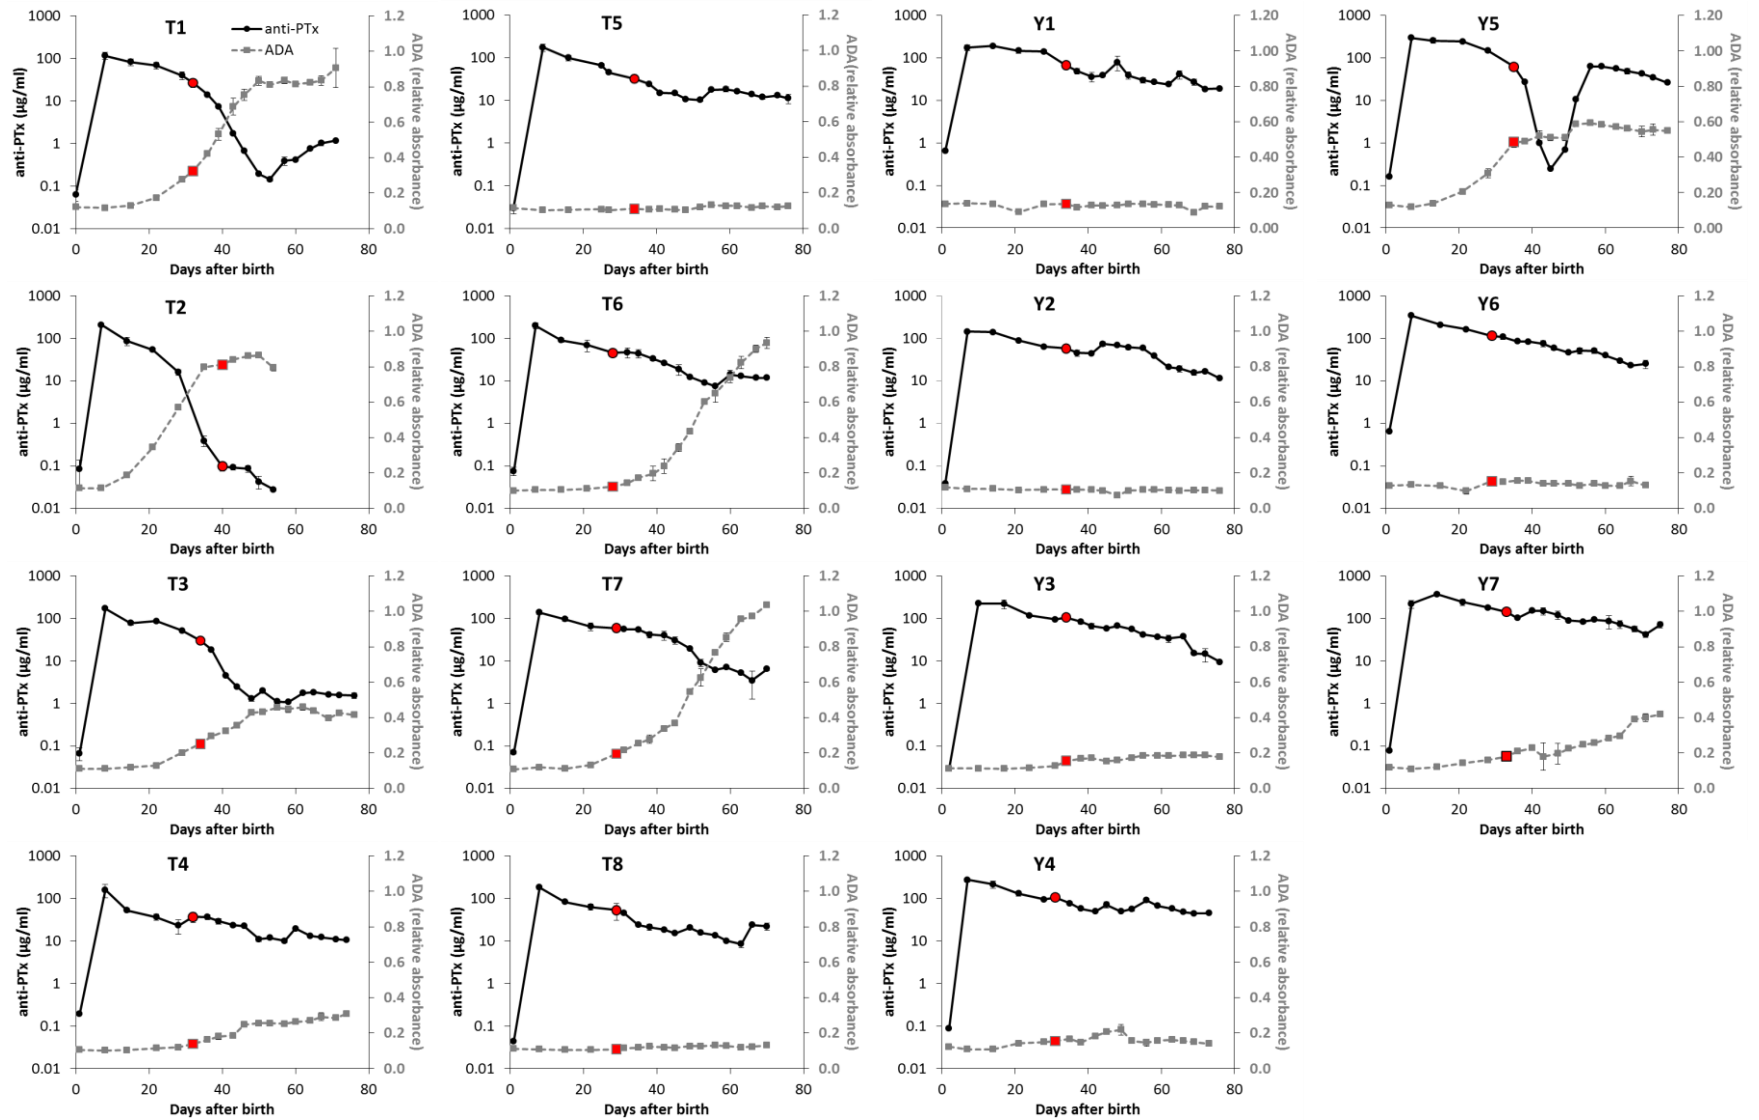

**Fig. S5. Temporal correlation of anti-PTx and antidrug antibody titers for each treated baboon.** Titers were measured for each treated baboon for antibodies binding PTx (left vertical axis, black line and circles) and antibodies binding the hu1B7 Fab (right vertical axis, grey line and squares). In each data set, the day the baboon was infected with *B. pertussis* is identified by a red marker.

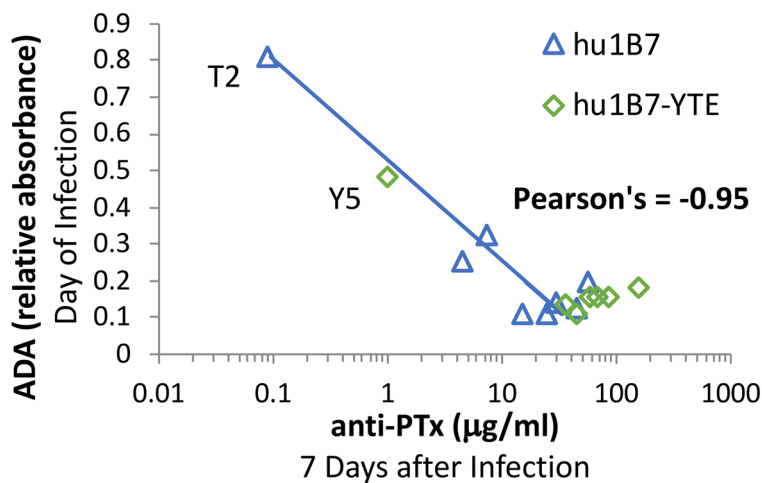

**Fig. S6. Pearson correlation of antidrug antibody titers and anti-PTx titers.** A strong correlation exists between anti-PTx antibody titer seven days after infection and day of infection anti-drug antibody titer (Pearson's correlation of -0.95 for hu1B7 treated animals). Data from animals treated with hu1B7 is shown in blue triangles and data from animals treated with hu1B7-YTE is shown in green diamonds.

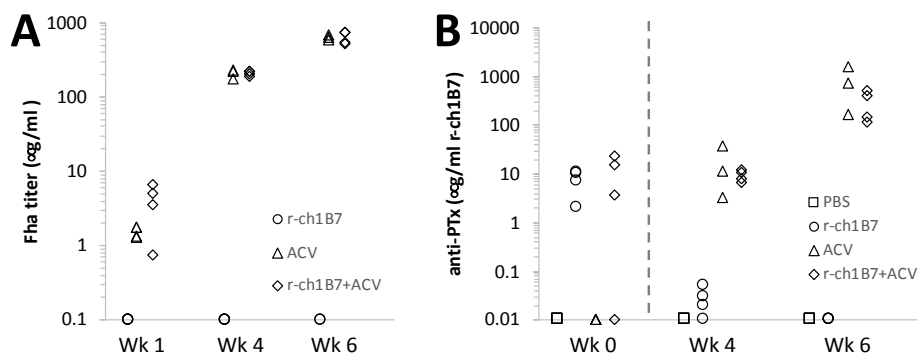

**Fig. S7. Presence of 1B7 does not interfere with anti-PTx responses due to vaccination.** Mice were administered 20 µg r-ch1B7 (human binding site + mouse Fc), immunized 24 hrs later with 1/50<sup>th</sup> human dose and boosted four weeks later. The (A) anti-Fha and (B) anti-PTx serum titers were monitored weekly for six weeks. Control mice included those only administered r-ch1B7 to monitor the titer of this specific antibody versus the polyclonal endogenous mouse response. No differences were observed in titers of immunized mice immunized based on the presence of r-ch1B7. Shown are data for individual mice; use of purified r-ch1B7 or a mouse anti-Fha antibody as a reference allowed for quantification of serum antibody titers and standardization between plates.





Baboon C2

| Challenge |      | WBC                  |                      |                      |                      |                      |                      |                      |      |      |                      |       |      |      |       | Avg    |      |      |          | serum anti-FHA |     | serum anti-PTx |     | serum ADA |     | NPW anti-PTx |      |
|-----------|------|----------------------|----------------------|----------------------|----------------------|----------------------|----------------------|----------------------|------|------|----------------------|-------|------|------|-------|--------|------|------|----------|----------------|-----|----------------|-----|-----------|-----|--------------|------|
| Age       | Day  | Total                | Neut                 | Lymph                | Mono                 | Eosin                | Baso                 | RBC                  | HGB  | HCT  | PLT                  | MCV   | MCH  | MCHC | Retic | Weight | Temp | HR   | Avg Resp | IU/ml          | +/- | µg/ml          | +/- | rel abs   | +/- | ng/ml        | +/-  |
| days      | days | x10 <sup>3</sup> /µl | x10 <sup>3</sup> /µl | x10 <sup>3</sup> /µl | x10 <sup>3</sup> /µl | x10 <sup>3</sup> /µl | x10 <sup>3</sup> /µl | x10 <sup>6</sup> /µl | g/dL | %    | x10 <sup>3</sup> /µl | fl    | pg   | %    | kg    | °F     | /min | /min |          |                |     |                |     |           |     |              |      |
| 2         | -32  | 7.38                 | 3.62                 | 2.94                 | 0.77                 | 0.0                  | 0.0                  | 5.14                 | 16.0 | 51.8 | 460                  | 101.0 | 31.1 | 30.9 | 1.6   | nd     | nd   | nd   | nd       | 1.3            | 0.0 | 0.4            | 0.0 | nd        | nd  | nd           | nd   |
| 8         | -26  | 7.80                 | 3.06                 | 3.91                 | 0.81                 | 0.0                  | 0.0                  | 4.94                 | 14.9 | 46.6 | 594                  | 94.3  | 30.2 | 32.0 | 0.3   | nd     | nd   | nd   | nd       | 1.1            | 0.0 | 0.3            | 0.0 | nd        | nd  | nd           | nd   |
| 15        | -19  | 10.97                | 4.08                 | 5.98                 | 0.87                 | 0.0                  | 0.0                  | 4.70                 | 13.7 | 43.6 | 676                  | 92.8  | 29.1 | 31.4 | 0.9   | nd     | nd   | nd   | nd       | 0.9            | 0.1 | 0.2            | 0.0 | nd        | nd  | nd           | nd   |
| 22        | -12  | 10.40                | 4.34                 | 5.42                 | 0.61                 | 0.0                  | 0.0                  | 4.42                 | 12.4 | 40.0 | 450                  | 90.5  | 28.1 | 31.0 | 2.6   | nd     | nd   | nd   | nd       | 1.2            | 0.1 | 0.2            | 0.0 | nd        | nd  | nd           | nd   |
| 29        | -5   | 9.30                 | 3.14                 | 5.62                 | 0.50                 | 0.0                  | 0.0                  | 4.60                 | 12.6 | 40.3 | 495                  | 87.6  | 27.4 | 31.3 | 2.6   | nd     | nd   | nd   | nd       | 0.9            | 0.1 | 0.1            | 0.0 | nd        | nd  | nd           | nd   |
| 34        | 0    | 7.31                 | 4.03                 | 3.05                 | 0.23                 | 0.0                  | 0.0                  | 4.32                 | 11.7 | 37.0 | 455                  | 85.6  | 27.1 | 31.6 | 2.1   | nd     | 99.1 | nd   | nd       | 0.8            | 0.1 | 0.1            | 0.0 | nd        | nd  | nd           | nd   |
| 37        | 3    | 14.73                | 3.48                 | 10.8                 | 0.34                 | 0.1                  | 0.0                  | 4.21                 | 11.1 | 35.0 | 496                  | 83.1  | 26.4 | 31.7 | 1.8   | 1.16   | 97.8 | 178  | 50       | 0.3            | 0.0 | 0.1            | 0.0 | nd        | nd  | 0.03         | 0.01 |
| 41        | 7    | 26.68                | 6.72                 | 18.9                 | 0.91                 | 0.2                  | 0.0                  | 4.25                 | 11.1 | 35.2 | 429                  | 82.8  | 26.1 | 31.5 | 2.0   | 1.22   | 98.5 | 221  | 99       | 0.4            | 0.0 | 0.0            | 0.0 | nd        | nd  | nd           | nd   |
| 44        | 10   | 51.81                | 21.6                 | 26.3                 | 3.57                 | 0.4                  | 0.0                  | 4.21                 | 10.7 | 35.3 | 454                  | 83.8  | 25.4 | 30.3 | 1.6   | nd     | 99.0 | 199  | 74       | 0.6            | 0.0 | 0.0            | 0.0 | nd        | nd  | nd           | nd   |

Baboon C3

| Challenge |      | WBC                  |                      |                      |                      |                      |                      |                      |      |      |                      |      |      |      |       | Avg    |      |      |          | serum anti-FHA |     | serum anti-PTx |     | serum ADA |     | NPW anti-PTx |     |
|-----------|------|----------------------|----------------------|----------------------|----------------------|----------------------|----------------------|----------------------|------|------|----------------------|------|------|------|-------|--------|------|------|----------|----------------|-----|----------------|-----|-----------|-----|--------------|-----|
| Age       | Day  | Total                | Neut                 | Lymph                | Mono                 | Eosin                | Baso                 | RBC                  | HGB  | HCT  | PLT                  | MCV  | MCH  | MCHC | Retic | Weight | Temp | HR   | Avg Resp | IU/ml          | +/- | µg/ml          | +/- | rel abs   | +/- | ng/ml        | +/- |
| days      | days | x10 <sup>3</sup> /µl | x10 <sup>3</sup> /µl | x10 <sup>3</sup> /µl | x10 <sup>3</sup> /µl | x10 <sup>3</sup> /µl | x10 <sup>3</sup> /µl | x10 <sup>6</sup> /µl | g/dL | %    | x10 <sup>3</sup> /µl | fl   | pg   | %    | kg    | °F     | /min | /min |          |                |     |                |     |           |     |              |     |
| 1         | -36  | 12.33                | 8.38                 | 2.93                 | 0.83                 | 0.2                  | 0.0                  | 4.31                 | 13.4 | 38.5 | 253                  | 89.3 | 31.1 | 34.8 | 3.2   | nd     | nd   | nd   | nd       | 6.5            | 1.4 | 0.5            | 0.2 | nd        | nd  | nd           | nd  |
| 8         | -29  | 5.10                 | 1.35                 | 3.31                 | 0.42                 | 0.0                  | 0.0                  | 4.51                 | 13.5 | 40.8 | 417                  | 90.5 | 29.9 | 33.1 | 1.3   | nd     | nd   | nd   | nd       | 5.9            | 0.7 | 0.1            | 0.0 | nd        | nd  | nd           | nd  |
| 15        | -22  | 7.47                 | 2.03                 | 4.94                 | 0.45                 | 0.1                  | 0.0                  | 4.70                 | 13.6 | 41.4 | 217                  | 88.1 | 28.9 | 32.9 | 3.8   | nd     | nd   | nd   | nd       | 4.8            | 0.0 | 0.0            | 0.0 | nd        | nd  | nd           | nd  |
| 22        | -15  | 8.01                 | 2.15                 | 5.31                 | 0.47                 | 0.1                  | 0.0                  | 4.65                 | 13.0 | 40.5 | 282                  | 87.1 | 28.0 | 32.1 | 3.6   | nd     | nd   | nd   | nd       | 2.2            | 0.2 | 0.0            | 0.0 | nd        | nd  | nd           | nd  |
| 29        | -8   | 6.92                 | 1.78                 | 4.74                 | 0.36                 | 0.0                  | 0.0                  | 4.68                 | 12.8 | 39.2 | 367                  | 83.8 | 27.4 | 32.7 | 3.5   | nd     | nd   | nd   | nd       | 1.7            | 0.0 | 0.0            | 0.0 | nd        | nd  | nd           | nd  |
| 36        | -1   | 8.53                 | 1.95                 | 6.05                 | 0.51                 | 0.0                  | 0.0                  | 5.38                 | 14.4 | 45.2 | 202                  | 84.0 | 26.8 | 31.9 | 1.7   | nd     | nd   | nd   | nd       | 1.6            | 0.2 | 0.0            | 0.0 | nd        | nd  | nd           | nd  |
| 37        | 0    | nd                   | nd                   | nd                   | nd                   | nd                   | nd                   | nd                   | nd   | nd   | nd                   | nd   | nd   | nd   | nd    | 1.22   | 98.9 | 189  | 51       | 1.4            | 0.1 | 0.0            | 0.0 | nd        | nd  | nd           | nd  |
| 40        | 3    | 17.13                | 2.84                 | 13.6                 | 0.62                 | 0.1                  | 0.0                  | 5.06                 | 13.4 | 41.6 | 279                  | 82.2 | 26.5 | 32.2 | 0.7   | 1.24   | 98.8 | 190  | 93       | 1.9            | 0.2 | 0.1            | 0.0 | nd        | nd  | 0.1          | 0.1 |
| 44        | 7    | 56.89                | 21.0                 | 30.0                 | 5.66                 | 0.3                  | 0.0                  | 4.64                 | 12.2 | 38.6 | 340                  | 83.2 | 26.2 | 31.5 | 1.7   | 1.2    | 97.3 | 215  | 82       | 0.8            | 0.0 | 0.1            | 0.0 | nd        | nd  | nd           | nd  |

Baboon C4

| Challenge |      | WBC                  |                      |                      |                      |                      |                      |                      |      |      |                      |      |      |      |       | Avg    | Avg   | Avg  | serum |          | serum    |          | serum   |     | NPW      |          |     |
|-----------|------|----------------------|----------------------|----------------------|----------------------|----------------------|----------------------|----------------------|------|------|----------------------|------|------|------|-------|--------|-------|------|-------|----------|----------|----------|---------|-----|----------|----------|-----|
| Age       | Day  | Total                | Neut                 | Lymph                | Mono                 | Eosin                | Baso                 | RBC                  | HGB  | HCT  | PLT                  | MCV  | MCH  | MCHC | Retic | Weight | Temp  | HR   | Resp  | anti-FHA | anti-PTx | anti-PTx | ADA     | ADA | anti-PTx | anti-PTx |     |
| days      | days | x10 <sup>3</sup> /μl | x10 <sup>3</sup> /μl | x10 <sup>3</sup> /μl | x10 <sup>3</sup> /μl | x10 <sup>3</sup> /μl | x10 <sup>3</sup> /μl | x10 <sup>6</sup> /μl | g/dL | %    | x10 <sup>3</sup> /μl | fL   | pg   | %    | kg    | °F     | /min  | /min | IU/ml | +/-      | μg/ml    | +/-      | rel abs | +/- | ng/ml    | +/-      |     |
| 5         | -27  | 4.03                 | 2.29                 | 1.33                 | 0.33                 | 0.0                  | 0.0                  | 5.41                 | 15.8 | 49.3 | 291                  | 91.1 | 29.2 | 32.0 | 0.6   | nd     | nd    | nd   | nd    | 0.4      | 0.0      | 0.0      | 0.0     | nd  | nd       | nd       | nd  |
| 7         | -25  | 4.65                 | 1.72                 | 2.29                 | 0.53                 | 0.1                  | 0.0                  | 5.31                 | 15.3 | 48.2 | 270                  | 90.8 | 28.8 | 31.7 | 0.5   | nd     | nd    | nd   | nd    | 0.3      | 0.1      | 0.0      | 0.0     | nd  | nd       | nd       | nd  |
| 14        | -18  | 4.61                 | 1.96                 | 2.23                 | 0.33                 | 0.1                  | 0.0                  | 4.87                 | 13.8 | 41.0 | 404                  | 84.2 | 28.3 | 33.7 | 1.8   | nd     | nd    | nd   | nd    | 0.4      | 0.0      | 0.0      | 0.0     | nd  | nd       | nd       | nd  |
| 21        | -11  | 4.48                 | 1.74                 | 2.34                 | 0.22                 | 0.1                  | 0.0                  | 4.57                 | 12.3 | 38.3 | 400                  | 83.8 | 26.9 | 32.1 | 2.1   | nd     | nd    | nd   | nd    | 3.0      | 0.1      | 0.0      | 0.0     | nd  | nd       | nd       | nd  |
| 28        | -4   | 6.9                  | 2.61                 | 3.89                 | 0.29                 | 0.1                  | 0.0                  | 4.96                 | 12.6 | 40.8 | 462                  | 82.3 | 25.4 | 30.9 | 3.0   | nd     | nd    | nd   | nd    | nd       | nd       | nd       | nd      | nd  | nd       | nd       | nd  |
| 32        | 0    | 2.09                 | 0.83                 | 1.12                 | 0.13                 | 0.0                  | 0.0                  | 4.57                 | 11.2 | 35.7 | 415                  | 78.1 | 24.5 | 31.4 | 2.1   | 1.15   | 99.1  | 157  | 54    | 4.0      | 1.1      | 0.1      | 0.0     | nd  | nd       | nd       | nd  |
| 35        | 3    | 16.34                | 4.93                 | 10.8                 | 0.46                 | 0.1                  | 0.0                  | 4.45                 | 10.9 | 34.3 | 408                  | 77.1 | 24.5 | 31.8 | 1.2   | 1.20   | 99.8  | 171  | 71    | 4.5      | 0.1      | 0.1      | 0.0     | nd  | nd       | 0.0      | 0.0 |
| 39        | 7    | 33.24                | 19.1                 | 12.2                 | 1.63                 | 0.2                  | 0.1                  | 4.24                 | 9.7  | 32.2 | 377                  | 75.9 | 22.9 | 30.1 | 1.1   | 1.12   | 100.5 | 178  | 114   | 3.6      | 0.1      | 0.1      | 0.0     | nd  | nd       | nd       | nd  |
| 42        | 10   | 32.15                | 16.6                 | 13.1                 | 2.38                 | 0.1                  | 0.1                  | 4.41                 | 9.8  | 32.7 | 563                  | 74.1 | 22.2 | 30.0 | 1.3   | 1.11   | 99.8  | 214  | 109   | 4.8      | 2.5      | 0.0      | 0.0     | nd  | nd       | nd       | nd  |
| 46        | 14   | 29.39                | 14.9                 | 12.6                 | 1.65                 | 0.1                  | 0.0                  | 4.71                 | 10.1 | 33.9 | 333                  | 72.0 | 21.4 | 29.8 | 1.3   | 1.09   | 97.9  | nd   | nd    | 17.4     | 1.1      | 0.1      | 0.0     | nd  | nd       | nd       | nd  |
| 49        | 17   | 27.04                | 12.2                 | 13.3                 | 1.22                 | 0.2                  | 0.0                  | 4.47                 | 9.4  | 31.1 | 233                  | 69.6 | 21.0 | 30.2 | 2.4   | 1.15   | 98.7  | nd   | nd    | 43.3     | 0.7      | 0.1      | 0.0     | nd  | nd       | nd       | nd  |
| 53        | 21   | 22.39                | 11.6                 | 8.84                 | 1.72                 | 0.2                  | 0.0                  | 4.66                 | 9.9  | 32.6 | 194                  | 70.0 | 21.2 | 30.4 | 3.5   | 1.20   | 98.6  | nd   | nd    | 212.7    | 0.9      | 0.1      | 0.0     | nd  | nd       | nd       | nd  |
| 56        | 24   | 14.26                | 7.33                 | 5.60                 | 1.10                 | 0.2                  | 0.0                  | 4.78                 | 10.1 | 32.5 | 338                  | 68.0 | 21.1 | 31.1 | 4.2   | 1.19   | 98.5  | nd   | nd    | 651.0    | 14.8     | 0.1      | 0.0     | nd  | nd       | nd       | nd  |
| 60        | 28   | 7.52                 | 3.29                 | 3.18                 | 0.76                 | 0.3                  | 0.0                  | 4.78                 | 9.8  | 32.6 | 353                  | 68.2 | 20.5 | 30.1 | 2.5   | 1.22   | 97.9  | nd   | nd    | 1522.3   | 449.6    | 0.1      | 0.0     | nd  | nd       | nd       | nd  |
| 63        | 31   | 7.54                 | 3.92                 | 2.75                 | 0.66                 | 0.2                  | 0.0                  | 4.86                 | 10.1 | 33.5 | 422                  | 68.9 | 20.8 | 30.1 | 2.3   | 1.24   | 98.7  | nd   | nd    | 5526.2   | 224.4    | 0.1      | 0.0     | nd  | nd       | nd       | nd  |
| 67        | 35   | 6.82                 | 4.33                 | 1.92                 | 0.49                 | 0.1                  | 0.0                  | 5.09                 | 10.6 | 34.7 | 375                  | 68.2 | 20.8 | 30.5 | 2.2   | 1.27   | 98.9  | nd   | nd    | 4917.2   | 368.3    | 0.1      | 0.0     | nd  | nd       | nd       | nd  |
| 70        | 38   | 4.98                 | 3.19                 | 1.46                 | 0.27                 | 0.1                  | 0.0                  | 4.96                 | 10.5 | 33.8 | 305                  | 68.1 | 21.2 | 31.1 | 2.0   | 1.30   | 98.4  | nd   | nd    | 3548.1   | 83.8     | 0.1      | 0.0     | nd  | nd       | nd       | nd  |
| 74        | 42   | 5.97                 | 3.52                 | 2.06                 | 0.28                 | 0.1                  | 0.0                  | 5.21                 | 11.2 | 36.7 | 288                  | 70.4 | 21.5 | 30.5 | 2.6   | 1.33   | 99.4  | nd   | nd    | 3221.7   | 73.9     | 0.1      | 0.0     | nd  | nd       | nd       | nd  |

Baboon C5

| Challenge |      | WBC                  |                      |                      |                      |                      |                      |                      |      |      |                      |      |      |      |       | Avg    | Avg   | Avg   | serum |          | serum    |      | serum    |          | NPW      |     |     |
|-----------|------|----------------------|----------------------|----------------------|----------------------|----------------------|----------------------|----------------------|------|------|----------------------|------|------|------|-------|--------|-------|-------|-------|----------|----------|------|----------|----------|----------|-----|-----|
| Age       | Day  | Total                | Neut                 | Lymph                | Mono                 | Eosin                | Baso                 | RBC                  | HGB  | HCT  | PLT                  | MCV  | MCH  | MCHC | Retic | Weight | Temp  | HR    | Resp  | anti-FHA | anti-PTx | ADA  | anti-PTx | anti-PTx | anti-PTx |     |     |
| days      | days | x10 <sup>3</sup> /μl | x10 <sup>3</sup> /μl | x10 <sup>3</sup> /μl | x10 <sup>3</sup> /μl | x10 <sup>3</sup> /μl | x10 <sup>3</sup> /μl | x10 <sup>6</sup> /μl | g/dL | %    | x10 <sup>3</sup> /μl | fL   | pg   | %    | kg    | °F     | /min  | /min  | IU/ml | +/-      | μg/ml    | +/-  | rel abs  | +/-      | ng/ml    | +/- |     |
| 0         | -35  | nd                   | nd                   | nd                   | nd                   | nd                   | nd                   | nd                   | nd   | nd   | nd                   | nd   | nd   | nd   | nd    | nd     | nd    | nd    | nd    | 0.4      | 0.0      | 0.1  | 0.0      | nd       | nd       | nd  | nd  |
| 7         | -28  | 6.08                 | 2.83                 | 2.51                 | 0.65                 | 0.1                  | 0.0                  | 5.75                 | 16.7 | 50.6 | 344                  | 88.0 | 29.0 | 33.0 | 0.4   | nd     | nd    | nd    | nd    | 0.4      | 0.0      | 0.2  | 0.0      | nd       | nd       | nd  | nd  |
| 13        | -22  | 6.36                 | 2.79                 | 3.00                 | 0.52                 | 0.0                  | 0.0                  | 5.07                 | 14.4 | 43.6 | 644                  | 86.0 | 28.4 | 33.0 | 2.6   | nd     | nd    | nd    | nd    | 0.8      | 0.3      | 0.2  | 0.0      | nd       | nd       | nd  | nd  |
| 20        | -15  | 6.07                 | 2.01                 | 3.47                 | 0.45                 | 0.1                  | 0.0                  | 4.91                 | 13.7 | 41.1 | 367                  | 83.7 | 27.9 | 33.3 | 4.2   | nd     | nd    | nd    | nd    | 1.0      | 0.1      | 0.2  | 0.0      | nd       | nd       | nd  | nd  |
| 27        | -8   | 6.11                 | 1.73                 | 3.88                 | 0.43                 | 0.1                  | 0.0                  | 4.69                 | 12.7 | 39.6 | 430                  | 84.4 | 27.1 | 32.1 | 5.0   | nd     | nd    | nd    | nd    | 0.6      | 0.1      | 0.2  | 0.0      | nd       | nd       | nd  | nd  |
| 35        | 0    | 5.04                 | 2.99                 | 1.90                 | 0.14                 | 0.0                  | 0.0                  | 4.72                 | 12.6 | 38.2 | 425                  | 80.9 | 26.7 | 33.0 | 2.6   | 1.3    | 98.9  | nd    | nd    | 0.9      | 0.0      | 0.1  | 0.0      | nd       | nd       | nd  | nd  |
| 38        | 3    | 11.65                | 2.85                 | 8.29                 | 0.40                 | 0.1                  | 0.0                  | 4.79                 | 12.6 | 39.3 | 381                  | 82.0 | 26.3 | 32.1 | 2.2   | 1.29   | 99.6  | nd    | nd    | 0.8      | 0.0      | 0.1  | 0.0      | nd       | nd       | 0.0 | 0.0 |
| 42        | 7    | 17.94                | 3.77                 | 13.6                 | 0.47                 | 0.1                  | 0.0                  | 4.57                 | 11.8 | 36.6 | 468                  | 80.1 | 25.8 | 32.2 | 4.2   | 1.39   | 98.2  | nd    | nd    | 0.9      | 0.0      | 0.1  | 0.0      | nd       | nd       | nd  | nd  |
| 46        | 11   | 17.63                | 2.15                 | 14.6                 | 0.71                 | 0.1                  | 0.0                  | 4.71                 | 12.2 | 38.5 | 500                  | 81.7 | 25.9 | 31.7 | 5.0   | 1.42   | 99.0  | nd    | nd    | 1.1      | 0.2      | 0.1  | 0.0      | nd       | nd       | nd  | nd  |
| 49        | 14   | 17.62                | 1.74                 | 15.1                 | 0.65                 | 0.1                  | 0.0                  | 5.18                 | 13.2 | 42.2 | 506                  | 81.5 | 25.5 | 31.3 | 4.0   | 1.47   | 99.6  | nd    | nd    | 1.9      | 0.2      | 0.1  | 0.0      | nd       | nd       | nd  | nd  |
| 51        | 16   | 21.16                | 2.45                 | 17.2                 | 1.25                 | 0.1                  | 0.0                  | 4.92                 | 12.6 | 39.7 | 524                  | 80.7 | 25.6 | 31.7 | 3.4   | 1.54   | 98.9  | nd    | nd    | 3.0      | 0.6      | 0.2  | 0.0      | nd       | nd       | nd  | nd  |
| 56        | 21   | 13.55                | 2.04                 | 10.9                 | 0.51                 | 0.0                  | 0.0                  | 5.20                 | 13.2 | 41.9 | 614                  | 80.6 | 25.4 | 31.5 | 3.3   | 1.63   | 99.5  | nd    | nd    | 18.9     | 1.3      | 4.0  | 1.8      | nd       | nd       | nd  | nd  |
| 59        | 24   | 9.13                 | 1.92                 | 6.90                 | 0.28                 | 0.0                  | 0.0                  | 4.96                 | 12.7 | 40.2 | 553                  | 81.0 | 25.6 | 31.6 | 2.7   | 1.60   | 99.4  | nd    | nd    | 79.3     | 3.7      | 8.7  | 1.9      | nd       | nd       | nd  | nd  |
| 63        | 28   | 6.43                 | 2.01                 | 4.06                 | 0.35                 | 0.0                  | 0.0                  | 4.91                 | 12.5 | 39.4 | 547                  | 80.2 | 25.5 | 31.7 | 3.6   | 1.63   | 99.6  | nd    | nd    | 195.8    | 47.5     | 11.3 | 1.9      | nd       | nd       | nd  | nd  |
| 66        | 31   | 6.15                 | 2.58                 | 3.22                 | 0.32                 | 0.0                  | 0.0                  | 5.07                 | 12.7 | 40.5 | 540                  | 79.9 | 25   | 31.4 | 2.5   | 1.67   | 99.4  | nd    | nd    | 199.2    | 21.4     | 9.4  | 0.4      | nd       | nd       | nd  | nd  |
| 70        | 35   | 4.62                 | 0.79                 | 3.43                 | 0.36                 | 0.0                  | 0.0                  | 5.18                 | 13.1 | 40.6 | 367                  | 78.4 | 25.3 | 32.3 | 2.0   | 1.72   | 100.2 | nd    | nd    | 237.0    | 67.1     | 7.9  | 2.5      | nd       | nd       | nd  | nd  |
| 73        | 38   | 3.72                 | 0.60                 | 2.73                 | 0.35                 | 0.0                  | 0.0                  | 5.08                 | 12.6 | 40.3 | 379                  | 79.3 | 24.8 | 31.3 | 1.8   | 1.76   | 100.2 | nd    | nd    | 279.2    | 45.3     | 6.9  | 0.3      | nd       | nd       | nd  | nd  |
| 77        | 42   | 5.96                 | 2.12                 | 3.49                 | 0.31                 | 0.0                  | 0.0                  | 5.37                 | 13.5 | 42.1 | 438                  | 78.4 | 25.1 | 32.1 | 1.7   | nd     | 98.25 | 176.0 | 32.0  | 326.3    | 90.6     | 7.2  | 0.9      | nd       | nd       | nd  | nd  |

Baboon C6

| Challenge |      | WBC                  |                      |                      |                      |                      |                      |                      |      |     |                      |      |      |      |       | Vitals |          |        |          | serum anti-FHA |                | serum anti-PTx |                | serum ADA |           | NPW anti-PTx |              |
|-----------|------|----------------------|----------------------|----------------------|----------------------|----------------------|----------------------|----------------------|------|-----|----------------------|------|------|------|-------|--------|----------|--------|----------|----------------|----------------|----------------|----------------|-----------|-----------|--------------|--------------|
| Age       | Day  | Total                | Neut                 | Lymph                | Mono                 | Eosin                | Baso                 | RBC                  | HGB  | HCT | PLT                  | MCV  | MCH  | MCHC | Retic | Weight | Avg Temp | Avg HR | Avg Resp | serum anti-FHA | serum anti-FHA | serum anti-PTx | serum anti-PTx | serum ADA | serum ADA | NPW anti-PTx | NPW anti-PTx |
| days      | days | x10 <sup>3</sup> /μl | x10 <sup>3</sup> /μl | x10 <sup>3</sup> /μl | x10 <sup>3</sup> /μl | x10 <sup>3</sup> /μl | x10 <sup>3</sup> /μl | x10 <sup>6</sup> /μl | g/dL | %   | x10 <sup>3</sup> /μl | fL   | pg   | %    | kg    | °F     | /min     | /min   | IU/ml    | +/-            | μg/ml          | +/-            | rel abs        | +/-       | ng/ml     | +/-          |              |
| 1         | -35  | nd                   | nd                   | nd                   | nd                   | nd                   | nd                   | nd                   | nd   | nd  | nd                   | nd   | nd   | nd   | nd    | nd     | nd       | nd     | nd       | 0.6            | 0.0            | 0.1            | 0.0            | nd        | nd        | nd           | nd           |
| 7         | -29  | 12.65                | 8.12                 | 3.59                 | 0.78                 | 0.1                  | 0.0                  | 5.55                 | 17   | 51  | 383                  | 92.6 | 30.1 | 32.5 | 0.3   | nd     | nd       | nd     | nd       | 1.0            | 0.1            | 0.1            | 0.0            | nd        | nd        | nd           | nd           |
| 15        | -21  | nd                   | nd                   | nd                   | nd                   | nd                   | nd                   | nd                   | nd   | nd  | nd                   | nd   | nd   | nd   | nd    | nd     | nd       | nd     | nd       | 1.0            | 0.3            | 0.1            | 0.0            | nd        | nd        | nd           | nd           |
| 22        | -14  | nd                   | nd                   | nd                   | nd                   | nd                   | nd                   | nd                   | nd   | nd  | nd                   | nd   | nd   | nd   | nd    | nd     | nd       | nd     | nd       | 1.9            | 0.3            | 0.3            | 0.1            | nd        | nd        | nd           | nd           |
| 29        | -7   | nd                   | nd                   | nd                   | nd                   | nd                   | nd                   | nd                   | nd   | nd  | nd                   | nd   | nd   | nd   | nd    | nd     | nd       | nd     | nd       | 2.9            | 0.3            | 0.4            | 0.0            | nd        | nd        | nd           | nd           |
| 36        | 0    | 6.58                 | 3.01                 | 3.32                 | 0.13                 | 0.1                  | 0.0                  | 4.70                 | 13   | 38  | 504                  | 81.5 | 27.2 | 33.4 | 1.0   | 1.36   | 101.1    | nd     | nd       | 3.8            | 0.6            | 0.9            | 0.1            | nd        | nd        | nd           | nd           |
| 39        | 3    | 24.25                | 7.54                 | 15.5                 | 0.78                 | 0.4                  | 0.0                  | 4.55                 | 12   | 38  | 420                  | 83.1 | 27.0 | 32.5 | 1.2   | 1.44   | 100.1    | nd     | nd       | 2.0            | 0.1            | 0.8            | 0.1            | nd        | nd        | 0.0          | 0.0          |
| 43        | 7    | 54.27                | 15.0                 | 35.1                 | 3.53                 | 0.7                  | 0.0                  | 4.94                 | 13   | 41  | 540                  | 83.8 | 25.9 | 30.9 | 2.0   | 1.405  | 100.2    | nd     | nd       | 2.3            | 0.4            | 1.4            | 0.2            | nd        | nd        | nd           | nd           |
| 46        | 10   | 51.67                | 18.2                 | 24.7                 | 8.11                 | 0.6                  | 0.1                  | 5.24                 | 13   | 42  | 94                   | 80.5 | 25.2 | 31.3 | 1.0   | 1.385  | 98.0     | nd     | nd       | 1.0            | 0.0            | 0.5            | 0.0            | nd        | nd        | nd           | nd           |

Baboon C7

| Challenge |      | WBC                  |                      |                      |                      |                      |                      |                      |      |      |                      |      |      |      |       | Vitals |          |        |          | serum anti-FHA |                | serum anti-PTx |                | serum ADA |           | NPW anti-PTx |              |
|-----------|------|----------------------|----------------------|----------------------|----------------------|----------------------|----------------------|----------------------|------|------|----------------------|------|------|------|-------|--------|----------|--------|----------|----------------|----------------|----------------|----------------|-----------|-----------|--------------|--------------|
| Age       | Day  | Total                | Neut                 | Lymph                | Mono                 | Eosin                | Baso                 | RBC                  | HGB  | HCT  | PLT                  | MCV  | MCH  | MCHC | Retic | Weight | Avg Temp | Avg HR | Avg Resp | serum anti-FHA | serum anti-FHA | serum anti-PTx | serum anti-PTx | serum ADA | serum ADA | NPW anti-PTx | NPW anti-PTx |
| days      | days | x10 <sup>3</sup> /μl | x10 <sup>3</sup> /μl | x10 <sup>3</sup> /μl | x10 <sup>3</sup> /μl | x10 <sup>3</sup> /μl | x10 <sup>3</sup> /μl | x10 <sup>6</sup> /μl | g/dL | %    | x10 <sup>3</sup> /μl | fL   | pg   | %    | kg    | °F     | /min     | /min   | IU/ml    | +/-            | μg/ml          | +/-            | rel abs        | +/-       | ng/ml     | +/-          |              |
| 1         | -26  | nd                   | nd                   | nd                   | nd                   | nd                   | nd                   | nd                   | nd   | nd   | nd                   | nd   | nd   | nd   | nd    | nd     | nd       | nd     | nd       | 1.1            | 0.0            | 0.2            | 0.0            | nd        | nd        | nd           | nd           |
| 8         | -19  | 9.06                 | 2.75                 | 5.82                 | 0.34                 | 0.1                  | 0.1                  | 5.2                  | 15.9 | 47.8 | 636                  | 92.5 | 30.8 | 33.3 | 0.3   | nd     | nd       | nd     | nd       | 0.8            | 0.1            | 0.2            | 0.0            | nd        | nd        | nd           | nd           |
| 15        | -12  | 7.96                 | 2.90                 | 4.72                 | 0.26                 | 0.1                  | 0.0                  | 4.4                  | 13.2 | 39.7 | 673                  | 89.4 | 29.7 | 33.2 | 1.9   | nd     | nd       | nd     | nd       | 0.5            | 0.0            | 0.2            | 0.0            | nd        | nd        | nd           | nd           |
| 22        | -5   | nd                   | nd                   | nd                   | nd                   | nd                   | nd                   | nd                   | nd   | nd   | nd                   | nd   | nd   | nd   | nd    | nd     | nd       | nd     | nd       | 0.4            | 0.0            | 0.2            | 0.0            | nd        | nd        | nd           | nd           |
| 27        | 0    | 7.41                 | 5.19                 | 2.08                 | 0.12                 | 0.0                  | 0.0                  | 3.9                  | 11.1 | 32.2 | 525                  | 81.7 | 28.2 | 34.5 | 1.2   | 1.11   | 100.4    | 135.0  | 33.0     | 0.3            | 0.0            | 0.0            | 0.0            | nd        | nd        | nd           | nd           |
| 30        | 3    | 23.27                | 4.93                 | 17.6                 | 0.56                 | 0.1                  | 0.0                  | 4.1                  | 11.4 | 34.2 | 382                  | 84.2 | 28.1 | 33.3 | 1.63  | 1.17   | 98.4     | 173.5  | 54.0     | 0.4            | 0.0            | 0.0            | 0.0            | nd        | nd        | 0.0          | 0.1          |
| 34        | 7    | 36.42                | 5.86                 | 29.5                 | 0.76                 | 0.3                  | 0.0                  | 4.3                  | 11.8 | 36.4 | 222                  | 84.5 | 27.4 | 32.4 | 3.25  | 1.16   | nd       | nd     | nd       | 0.3            | 0.0            | 0.0            | 0.0            | nd        | nd        | nd           | nd           |



Baboon T2

| Age<br>days | Challenge<br>Day<br>days | WBC                           |                              |                               |                              |                               |                              | RBC<br>x10 <sup>6</sup> /μl | HGB<br>g/dL | HCT<br>% | PLT<br>x10 <sup>3</sup> /μl | MCV<br>fL | MCH<br>pg | MCHC<br>% | Retic<br>% | Weight<br>kg | Avg<br>Temp<br>°F | Avg<br>HR<br>/min | Avg<br>Resp<br>/min | serum<br>anti-FHA |     | serum<br>anti-PTx |      | serum<br>ADA |      | NPW<br>anti-PTx |     |
|-------------|--------------------------|-------------------------------|------------------------------|-------------------------------|------------------------------|-------------------------------|------------------------------|-----------------------------|-------------|----------|-----------------------------|-----------|-----------|-----------|------------|--------------|-------------------|-------------------|---------------------|-------------------|-----|-------------------|------|--------------|------|-----------------|-----|
|             |                          | Total<br>x10 <sup>3</sup> /μl | Neut<br>x10 <sup>3</sup> /μl | Lymph<br>x10 <sup>3</sup> /μl | Mono<br>x10 <sup>3</sup> /μl | Eosin<br>x10 <sup>3</sup> /μl | Baso<br>x10 <sup>3</sup> /μl |                             |             |          |                             |           |           |           |            |              |                   |                   |                     | IU/ml             | +/- | μg/ml             | +/-  | rel abs      | +/-  | ng/ml           | +/- |
| 1           | -39                      | 13.80                         | 10.8                         | 1.71                          | 1.16                         | 0.0                           | 0.1                          | 5.25                        | 16.3        | 51.0     | 190                         | 97.1      | 31.0      | 32.0      | 4.2        | 1.0          | 97.8              | 161               | 61                  | 0.5               | 0.0 | 0.1               | 0.1  | 0.11         | 0.00 | nd              | nd  |
| 7           | -33                      | 5.81                          | 2.35                         | 2.77                          | 0.65                         | 0.0                           | 0.0                          | 5.68                        | 16.8        | 52.5     | 243                         | 92.4      | 29.6      | 32.0      | 0.6        | nd           | nd                | nd                | nd                  | 0.7               | 0.1 | 207.6             | 18.6 | 0.11         | 0.01 | nd              | nd  |
| 14          | -26                      | 9.46                          | 3.14                         | 5.33                          | 0.91                         | 0.0                           | 0.0                          | 5.17                        | 15.0        | 45.7     | 246                         | 88.4      | 29.0      | 32.8      | 3.0        | nd           | nd                | nd                | nd                  | 0.7               | 0.0 | 86.4              | 18.8 | 0.19         | 0.01 | nd              | nd  |
| 21          | -19                      | 7.40                          | 1.29                         | 5.30                          | 0.69                         | 0.1                           | 0.1                          | 5.26                        | 14.8        | 45.0     | 179                         | 85.6      | 28.1      | 32.9      | 2.9        | nd           | nd                | nd                | nd                  | 0.7               | 0.0 | 54.1              | 6.0  | 0.35         | 0.00 | nd              | nd  |
| 28          | -12                      | 7.25                          | 2.40                         | 4.30                          | 0.49                         | 0.1                           | 0.0                          | 4.72                        | 12.8        | 40.6     | 202                         | 86.0      | 27.1      | 31.5      | 5.2        | nd           | nd                | nd                | nd                  | 0.6               | 0.0 | 16.0              | 2.4  | 0.57         | 0.01 | nd              | nd  |
| 35          | -5                       | 10.53                         | 4.03                         | 6.00                          | 0.42                         | 0.1                           | 0.0                          | 5.01                        | 13.6        | 42.3     | 244                         | 84.4      | 27.1      | 32.2      | 4.7        | nd           | nd                | nd                | nd                  | 0.7               | 0.0 | 0.4               | 0.1  | 0.80         | 0.00 | nd              | nd  |
| 40          | 0                        | 7.70                          | 5.53                         | 1.96                          | 0.18                         | 0.0                           | 0.0                          | 4.80                        | 12.8        | 39.7     | 247                         | 82.7      | 26.7      | 32.2      | 3.7        | nd           | 99.0              | nd                | nd                  | 0.9               | 0.2 | 0.1               | 0.0  | 0.81         | 0.01 | nd              | nd  |
| 43          | 3                        | 17.49                         | 2.36                         | 14.3                          | 0.58                         | 0.2                           | 0.0                          | 5.03                        | 13.0        | 41.5     | 215                         | 82.5      | 25.8      | 31.3      | 3.0        | 1.6          | 98.7              | 200               | 62                  | 0.5               | 0.0 | 0.1               | 0.0  | 0.84         | 0.01 | 0.1             | 0.0 |
| 47          | 7                        | 59.18                         | 17.2                         | 34.6                          | 6.92                         | 0.5                           | 0.0                          | 4.83                        | 12.5        | 40.8     | 325                         | 84.5      | 25.9      | 30.6      | 1.6        | 1.54         | 100.6             | 248               | 99                  | 0.5               | 0.0 | 0.1               | 0.0  | 0.86         | 0.01 | nd              | nd  |
| 50          | 10                       | 75.51                         | 26.4                         | 39.1                          | 9.59                         | 0.4                           | 0.1                          | 4.87                        | 12.3        | 40.3     | 240                         | 82.8      | 25.3      | 30.5      | 1.4        | nd           | 99.4              | 256               | 110                 | 0.3               | 0.0 | 0.0               | 0.0  | 0.86         | 0.01 | nd              | nd  |
| 54          | 14                       | 64.05                         | 26.1                         | 30.7                          | 6.85                         | 0.3                           | 0.1                          | 4.79                        | 11.8        | 38.4     | 105                         | 80.2      | 24.6      | 30.7      | 2.2        | nd           | 98.2              | 230               | 149                 | 4.7               | 0.0 | 0.0               | 0.0  | 0.79         | 0.02 | nd              | nd  |

Baboon T3

| Challenge |      | WBC                  |                      |                      |                      |                      |                      |                      |      |      |                      |      |      |      |       | Avg    | Avg  | Avg  | serum |          | serum    |       | serum    |      | NPW      |     |          |
|-----------|------|----------------------|----------------------|----------------------|----------------------|----------------------|----------------------|----------------------|------|------|----------------------|------|------|------|-------|--------|------|------|-------|----------|----------|-------|----------|------|----------|-----|----------|
| Age       | Day  | Total                | Neut                 | Lymph                | Mono                 | Eosin                | Baso                 | RBC                  | HGB  | HCT  | PLT                  | MCV  | MCH  | MCHC | Retic | Weight | Temp | HR   | Resp  | anti-FHA | anti-PTx | ADA   | anti-PTx | ADA  | anti-PTx | ADA | anti-PTx |
| days      | days | x10 <sup>3</sup> /μl | x10 <sup>3</sup> /μl | x10 <sup>3</sup> /μl | x10 <sup>3</sup> /μl | x10 <sup>3</sup> /μl | x10 <sup>3</sup> /μl | x10 <sup>6</sup> /μl | g/dL | %    | x10 <sup>3</sup> /μl | fL   | pg   | %    | kg    | °F     | /min | /min | IU/ml | +/-      | μg/ml    | +/-   | rel abs  | +/-  | ng/ml    | +/- |          |
| 1         | -33  | 11.60                | 7.69                 | 2.90                 | 0.93                 | 0.0                  | 0.0                  | 6.06                 | 18.4 | 57.2 | 230                  | 94.4 | 30.4 | 32.2 | 2.1   | 1.1    | 97.6 | 153  | 47    | 8.4      | 0.4      | 0.07  | 0.02     | 0.11 | 0.00     | nd  | nd       |
| 8         | -26  | 5.42                 | 1.82                 | 2.79                 | 0.78                 | 0.0                  | 0.0                  | 5.80                 | 17.0 | 52.2 | 235                  | 90.0 | 29.3 | 32.6 | 0.5   | nd     | nd   | nd   | nd    | 4.9      | 0.1      | 171.9 | 15.7     | 0.11 | 0.01     | nd  | nd       |
| 15        | -19  | 7.20                 | 3.20                 | 3.29                 | 0.66                 | 0.0                  | 0.0                  | 5.37                 | 15.2 | 47.2 | 162                  | 87.9 | 28.3 | 32.2 | 1.2   | nd     | nd   | nd   | nd    | 7.2      | 0.3      | 78.0  | 8.8      | 0.12 | 0.00     | nd  | nd       |
| 22        | -12  | 8.01                 | 3.17                 | 4.17                 | 0.65                 | 0.0                  | 0.0                  | 5.03                 | 13.9 | 42.7 | 246                  | 84.9 | 27.6 | 32.6 | 1.4   | nd     | nd   | nd   | nd    | 5.3      | 0.2      | 85.9  | 7.7      | 0.13 | 0.00     | nd  | nd       |
| 29        | -5   | 7.11                 | 3.21                 | 3.50                 | 0.40                 | 0.0                  | 0.0                  | 4.91                 | 12.9 | 40.9 | 323                  | 83.3 | 26.3 | 31.5 | 2.1   | nd     | nd   | nd   | nd    | 5.3      | 0.1      | 51.6  | 0.2      | 0.20 | 0.01     | nd  | nd       |
| 34        | 0    | 5.62                 | 3.80                 | 1.58                 | 0.23                 | 0.0                  | 0.0                  | 4.73                 | 12.2 | 38.0 | 279                  | 80.3 | 25.8 | 32.1 | 2.4   | nd     | 98.5 | 181  | 46    | 4.1      | 0.5      | 30.1  | 0.9      | 0.25 | 0.00     | nd  | nd       |
| 37        | 3    | 5.63                 | 3.03                 | 2.19                 | 0.40                 | 0.0                  | 0.0                  | 4.77                 | 12.2 | 37.8 | 256                  | 79.2 | 25.6 | 32.3 | 2.5   | 1.51   | 97.7 | 163  | 85    | 2.9      | 0.1      | 18.4  | 0.5      | 0.30 | 0.01     | 2.9 | 0.1      |
| 41        | 7    | 5.10                 | 1.72                 | 2.98                 | 0.38                 | 0.0                  | 0.0                  | 4.79                 | 12.1 | 37.8 | 306                  | 78.9 | 25.3 | 32.0 | 2.4   | 1.55   | 98.1 | 177  | 63    | 2.4      | 0.1      | 4.5   | 0.1      | 0.32 | 0.02     | nd  | nd       |
| 44        | 10   | 8.56                 | 3.28                 | 4.67                 | 0.57                 | 0.0                  | 0.0                  | 4.82                 | 12.1 | 37.8 | 328                  | 78.4 | 25.1 | 32.0 | 2.5   | 1.60   | 97.9 | 153  | 41    | 2.2      | 0.0      | 2.5   | 0.0      | 0.36 | 0.01     | nd  | nd       |
| 48        | 14   | 13.16                | 7.66                 | 4.94                 | 0.53                 | 0.0                  | 0.0                  | 5.09                 | 12.6 | 39.8 | 340                  | 78.2 | 24.8 | 31.7 | 2.3   | 1.66   | 96.7 | 148  | 42    | 5.2      | 0.3      | 1.3   | 0.2      | 0.43 | 0.00     | nd  | nd       |
| 51        | 17   | 9.05                 | 3.59                 | 4.95                 | 0.41                 | 0.0                  | 0.1                  | 5.20                 | 12.9 | 40.5 | 269                  | 77.9 | 24.8 | 31.9 | 1.9   | 1.67   | 97.2 | 135  | 32    | 13.3     | 1.0      | 2.0   | 0.2      | 0.43 | 0.01     | nd  | nd       |
| 55        | 21   | 7.74                 | 3.92                 | 3.44                 | 0.37                 | 0.0                  | 0.0                  | 5.17                 | 12.7 | 39.8 | 364                  | 77.0 | 24.6 | 31.9 | 1.1   | 1.72   | 98.0 | 163  | 52    | 69.8     | 4.6      | 1.1   | 0.1      | 0.46 | 0.00     | nd  | nd       |
| 58        | 24   | 5.72                 | 2.09                 | 3.29                 | 0.28                 | 0.1                  | 0.0                  | 4.98                 | 12.1 | 37.8 | 340                  | 75.9 | 24.3 | 32.0 | 1.0   | 1.77   | 98.8 | 184  | 51    | 93.2     | 6.1      | 1.1   | 0.0      | 0.45 | 0.02     | nd  | nd       |
| 62        | 28   | 4.63                 | 2.62                 | 1.81                 | 0.18                 | 0.0                  | 0.0                  | 5.46                 | 13.4 | 40.7 | 314                  | 74.5 | 24.5 | 32.9 | 0.8   | 1.70   | 98.2 | 130  | 39    | 107.6    | 14.6     | 1.7   | 0.1      | 0.46 | 0.02     | nd  | nd       |
| 65        | 31   | 3.91                 | 1.63                 | 2.05                 | 0.22                 | 0.0                  | 0.0                  | 5.13                 | 12.5 | 38.2 | 255                  | 74.5 | 24.4 | 32.7 | 1.0   | nd     | 97.7 | 161  | 41    | 186.7    | 0.4      | 1.8   | 0.1      | 0.44 | 0.00     | nd  | nd       |
| 69        | 35   | 4.36                 | 2.01                 | 2.16                 | 0.18                 | 0.0                  | 0.0                  | 5.21                 | 12.5 | 39.2 | 311                  | 75.2 | 24.0 | 31.9 | 1.6   | 1.85   | 98.0 | 134  | 51    | 238.4    | 8.1      | 1.6   | 0.0      | 0.40 | 0.00     | nd  | nd       |
| 72        | 38   | 4.05                 | 1.66                 | 2.19                 | 0.18                 | 0.0                  | 0.0                  | 5.19                 | 12.5 | 38.9 | 214                  | 75.0 | 24.1 | 32.1 | 1.2   | 1.91   | 98.8 | 129  | 48    | 293.9    | 32.2     | 1.6   | 0.1      | 0.43 | 0.00     | nd  | nd       |
| 76        | 42   | nd                   | nd                   | nd                   | nd                   | nd                   | nd                   | nd                   | nd   | nd   | nd                   | nd   | nd   | nd   | nd    | nd     | nd   | nd   | nd    | 304.4    | 39.4     | 1.5   | 0.2      | 0.42 | 0.01     | nd  | nd       |

Baboon T4

| Age<br>days | Challenge<br>Day<br>days | WBC                           |                              |                               |                              |                               |                              | RBC<br>x10 <sup>6</sup> /μl | HGB<br>g/dL | HCT<br>% | PLT<br>x10 <sup>3</sup> /μl | MCV<br>fL | MCH<br>pg | MCHC<br>% | Retic<br>% | Weight<br>kg | Avg<br>Temp<br>°F | Avg<br>HR<br>/min | Avg<br>Resp<br>/min | serum<br>anti-FHA |     | serum<br>anti-PTx |      | serum<br>ADA |      | NPW<br>anti-PTx |     |
|-------------|--------------------------|-------------------------------|------------------------------|-------------------------------|------------------------------|-------------------------------|------------------------------|-----------------------------|-------------|----------|-----------------------------|-----------|-----------|-----------|------------|--------------|-------------------|-------------------|---------------------|-------------------|-----|-------------------|------|--------------|------|-----------------|-----|
|             |                          | Total<br>x10 <sup>3</sup> /μl | Neut<br>x10 <sup>3</sup> /μl | Lymph<br>x10 <sup>3</sup> /μl | Mono<br>x10 <sup>3</sup> /μl | Eosin<br>x10 <sup>3</sup> /μl | Baso<br>x10 <sup>3</sup> /μl |                             |             |          |                             |           |           |           |            |              |                   |                   |                     | IU/ml             | +/- | μg/ml             | +/-  | rel abs      | +/-  | ng/ml           | +/- |
| 1           | -31                      | 7.63                          | 5.04                         | 1.95                          | 0.60                         | 0.0                           | 0.0                          | 5.14                        | 16.4        | 49.3     | 416                         | 95.9      | 31.9      | 33.3      | 4.0        | 1.0          | 97.9              | 162               | 82                  | 10.6              | 1.3 | 0.19              | 0.01 | 0.10         | 0.00 | nd              | nd  |
| 8           | -24                      | nd                            | nd                           | nd                            | nd                           | nd                            | nd                           | nd                          | nd          | nd       | nd                          | nd        | nd        | nd        | nd         | nd           | nd                | nd                | nd                  | 7.9               | 1.5 | 157.9             | 53.8 | 0.10         | 0.00 | nd              | nd  |
| 14          | -18                      | 5.65                          | 1.95                         | 3.09                          | 0.54                         | 0.1                           | 0.0                          | 4.59                        | 13.4        | 37.2     | 559                         | 81.0      | 29.2      | 36.0      | 1.9        | nd           | nd                | nd                | nd                  | 7.1               | 1.0 | 52.3              | 5.6  | 0.10         | 0.01 | nd              | nd  |
| 22          | -10                      | 6.04                          | 2.00                         | 3.65                          | 0.32                         | 0.1                           | 0.0                          | 4.25                        | 11.8        | 33.4     | 461                         | 78.6      | 27.8      | 35.3      | 3.6        | nd           | nd                | nd                | nd                  | 6.1               | 0.2 | 36.6              | 5.8  | 0.11         | 0.00 | nd              | nd  |
| 28          | -4                       | 5.25                          | 1.14                         | 3.52                          | 0.53                         | 0.1                           | 0.0                          | 4.12                        | 10.9        | 31.7     | 374                         | 76.9      | 26.5      | 34.4      | 2.2        | nd           | nd                | nd                | nd                  | 5.6               | 0.3 | 23.1              | 8.6  | 0.12         | 0.00 | nd              | nd  |
| 32          | 0                        | 4.95                          | 1.23                         | 3.30                          | 0.37                         | 0.0                           | 0.0                          | 4.21                        | 10.9        | 33.0     | 512                         | 78.4      | 25.9      | 33.0      | 4.3        | 1.2          | 98.5              | 172.3             | 59                  | 3.8               | 0.6 | 37.0              | 9.6  | 0.14         | 0.01 | nd              | nd  |
| 36          | 4                        | 12.91                         | 1.45                         | 10.6                          | 0.68                         | 0.2                           | 0.0                          | 4.09                        | 10.3        | 31.1     | 556                         | 76.0      | 25.2      | 33.1      | 3.1        | 1.3          | 99.6              | 141               | 93                  | 4.4               | 0.2 | 36.6              | 4.9  | 0.16         | 0.01 | 2.0             | 0.4 |
| 39          | 7                        | 20.07                         | 2.45                         | 16.6                          | 0.84                         | 0.2                           | 0.0                          | 4.07                        | 10.1        | 31.3     | 538                         | 76.9      | 24.8      | 32.3      | 4.6        | 1.48         | 99.5              | 188               | 81                  | 4.9               | 0.5 | 29.1              | 4.6  | 0.18         | 0.02 | nd              | nd  |
| 43          | 11                       | 23.46                         | 4.48                         | 17.9                          | 0.87                         | 0.1                           | 0.0                          | 4.25                        | 10.4        | 32.7     | 427                         | 76.9      | 24.5      | 31.8      | 6.2        | 1.50         | 98.4              | nd                | nd                  | 8.5               | 1.1 | 23.4              | 2.1  | 0.18         | 0.01 | nd              | nd  |
| 46          | 14                       | 20.04                         | 3.21                         | 15.9                          | 0.78                         | 0.1                           | 0.0                          | 4.59                        | 11.0        | 34.6     | 524                         | 75.4      | 24.0      | 31.8      | 4.6        | 1.50         | 99.2              | 180               | 48                  | 26.8              | 2.5 | 22.2              | 1.3  | 0.25         | 0.00 | nd              | nd  |
| 50          | 18                       | 12.60                         | 3.65                         | 8.40                          | 0.48                         | 0.1                           | 0.0                          | 4.75                        | 11.4        | 35.4     | 526                         | 74.5      | 24.0      | 32.2      | 2.6        | 1.53         | 99.0              | 189               | 86                  | 61.3              | 4.6 | 10.9              | 1.4  | 0.26         | 0.01 | nd              | nd  |
| 53          | 21                       | 7.64                          | 2.00                         | 5.12                          | 0.47                         | 0.0                           | 0.0                          | 4.54                        | 10.8        | 34.7     | 475                         | 76.4      | 23.8      | 31.1      | 2.5        | 1.60         | 98.5              | 146               | 75                  | 76.5              | 3.1 | 11.8              | 0.0  | 0.25         | 0.00 | nd              | nd  |
| 57          | 25                       | 4.93                          | 1.50                         | 3.04                          | 0.34                         | 0.0                           | 0.0                          | 4.80                        | 11.5        | 34.7     | 592                         | 72.3      | 24.0      | 33.1      | 2.2        | 1.61         | 98.9              | 163               | 48                  | 99.8              | 4.8 | 10.1              | 1.0  | 0.25         | 0.01 | nd              | nd  |
| 60          | 28                       | 5.14                          | 1.98                         | 2.86                          | 0.27                         | 0.0                           | 0.0                          | 4.66                        | 11.0        | 34.4     | 529                         | 73.8      | 23.6      | 32.0      | 1.8        | 1.67         | 99.7              | 176               | 48                  | 92.1              | 4.9 | 19.4              | 1.6  | 0.26         | 0.01 | nd              | nd  |
| 64          | 32                       | 4.59                          | 1.19                         | 3.04                          | 0.33                         | 0.0                           | 0.0                          | 4.76                        | 11.2        | 35.2     | 527                         | 73.9      | 23.5      | 31.8      | 2.7        | 1.70         | 99.1              | 168               | 57                  | 113.9             | 9.5 | 13.1              | 0.1  | 0.27         | 0.01 | nd              | nd  |
| 67          | 35                       | 4.18                          | 1.30                         | 2.65                          | 0.21                         | 0.0                           | 0.0                          | 4.89                        | 11.5        | 36.4     | 510                         | 74.4      | 23.5      | 31.6      | 2.7        | 1.77         | 98.5              | 160               | 56                  | 109.8             | 5.0 | 12.3              | 0.2  | 0.29         | 0.02 | nd              | nd  |
| 71          | 39                       | 5.65                          | 2.44                         | 2.95                          | 0.24                         | 0.0                           | 0.0                          | 4.75                        | 11.1        | 35.2     | 407                         | 74.1      | 23.4      | 31.5      | 2.3        | 1.88         | 98.9              | 143               | 57                  | 108.7             | 1.4 | 11.0              | 0.1  | 0.28         | 0.00 | nd              | nd  |
| 74          | 42                       | 4.38                          | 0.95                         | 3.23                          | 0.16                         | 0.0                           | 0.0                          | 5.02                        | 11.8        | 36.8     | 428                         | 73.3      | 23.5      | 32.1      | 2.2        | nd           | nd                | nd                | nd                  | 98.1              | 0.6 | 10.5              | 0.1  | 0.31         | 0.01 | nd              | nd  |



Baboon T5

| Challenge |      | WBC                  |                      |                      |                      |                      |                      |                      |      |      |                      |      |      |      |       |        |       | Avg   | Avg   | Avg      | serum |          | serum   |      | serum |          | NPW |  |
|-----------|------|----------------------|----------------------|----------------------|----------------------|----------------------|----------------------|----------------------|------|------|----------------------|------|------|------|-------|--------|-------|-------|-------|----------|-------|----------|---------|------|-------|----------|-----|--|
| Age       | Day  | Total                | Neut                 | Lymph                | Mono                 | Eosin                | Baso                 | RBC                  | HGB  | HCT  | PLT                  | MCV  | MCH  | MCHC | Retic | Weight | Temp  | HR    | Resp  | anti-FHA |       | anti-PTx |         | ADA  |       | anti-PTx |     |  |
| days      | days | x10 <sup>3</sup> /μl | x10 <sup>3</sup> /μl | x10 <sup>3</sup> /μl | x10 <sup>3</sup> /μl | x10 <sup>3</sup> /μl | x10 <sup>3</sup> /μl | x10 <sup>6</sup> /μl | g/dL | %    | x10 <sup>3</sup> /μl | fL   | pg   | %    | kg    | °F     | /min  | /min  | IU/ml | +/-      | μg/ml | +/-      | rel abs | +/-  | ng/ml | +/-      |     |  |
| 1         | -33  | 6.75                 | 3.79                 | 2.24                 | 0.64                 | 0.1                  | 0.0                  | 5.35                 | 16.0 | 49.3 | 296                  | 92.1 | 29.9 | 32.5 | 2.0   | nd     | 98.9  | 148   | 40    | 0.3      | 0.1   | 0.03     | 0.01    | 0.12 | 0.00  | nd       | nd  |  |
| 9         | -25  | 6.1                  | 1.26                 | 3.75                 | 1.01                 | 0.1                  | 0.0                  | 5.84                 | 16.6 | 48.9 | 217                  | 83.7 | 28.4 | 33.9 | 0.34  | nd     | nd    | nd    | nd    | 0.5      | 0.0   | 172.9    | 35.0    | 0.10 | 0.00  | nd       | nd  |  |
| 16        | -18  | 6.81                 | 1.97                 | 3.87                 | 0.87                 | 0.0                  | 0.1                  | 5.08                 | 14.1 | 44.1 | 442                  | 86.8 | 27.8 | 32.0 | 3.4   | nd     | nd    | nd    | nd    | 0.6      | 0.0   | 99.1     | 15.2    | 0.10 | 0.00  | nd       | nd  |  |
| 25        | -9   | 8.66                 | 2.80                 | 4.78                 | 0.99                 | 0.1                  | 0.0                  | 5.18                 | 14.2 | 44.1 | 226                  | 85.1 | 27.4 | 32.2 | 3.2   | nd     | nd    | nd    | nd    | 0.4      | 0.0   | 66.2     | 6.0     | 0.11 | 0.00  | nd       | nd  |  |
| 27        | -7   | 7.55                 | 2.15                 | 4.52                 | 0.78                 | 0.1                  | 0.0                  | 4.68                 | 12.7 | 40.0 | 464                  | 85.5 | 27.1 | 31.8 | 3.7   | nd     | nd    | nd    | nd    | 0.4      | 0.0   | 45.4     | 4.5     | 0.10 | 0.00  | nd       | nd  |  |
| 34        | 0    | 6.90                 | 3.42                 | 3.11                 | 0.32                 | 0.0                  | 0.0                  | 5.12                 | 13.4 | 42.1 | 555                  | 82.2 | 26.2 | 31.8 | 3.0   | 1.35   | 99.4  | 165.5 | 38.0  | 0.5      | 0.0   | 32.0     | 3.1     | 0.11 | 0.00  | nd       | nd  |  |
| 38        | 4    | 7.25                 | 2.44                 | 3.98                 | 0.75                 | 0.1                  | 0.0                  | 5.00                 | 13.0 | 40.1 | 378                  | 80.2 | 26.0 | 32.4 | 1.3   | 1.34   | 98.0  | 158   | 32    | 1.3      | 0.1   | 24.4     | 1.1     | 0.11 | 0.00  | 0.8      | 0.1 |  |
| 41        | 7    | 7.51                 | 2.35                 | 4.29                 | 0.78                 | 0.1                  | 0.0                  | 4.75                 | 12.3 | 37.9 | 464                  | 79.8 | 25.9 | 32.5 | 2.4   | 1.38   | 98.9  | 157   | 36    | 1.5      | 0.1   | 15.0     | 1.2     | 0.11 | 0.00  | nd       | nd  |  |
| 45        | 11   | 11.48                | 3.17                 | 7.76                 | 0.51                 | 0.0                  | 0.0                  | 4.87                 | 12.5 | 39.0 | 491                  | 80.1 | 25.7 | 32.1 | 3.3   | 1.42   | 98.9  | 152   | 42    | 2.4      | 0.1   | 14.7     | 0.6     | 0.11 | 0.00  | nd       | nd  |  |
| 48        | 14   | 12.74                | 3.57                 | 8.61                 | 0.51                 | 0.0                  | 0.0                  | 4.84                 | 12.2 | 38.9 | 433                  | 80.4 | 25.2 | 31.4 | 3.3   | 1.51   | 98.9  | 156   | 66    | 4.6      | 0.1   | 10.8     | 0.2     | 0.10 | 0.00  | nd       | nd  |  |
| 52        | 18   | 15.30                | 8.48                 | 6.46                 | 0.32                 | 0.0                  | 0.0                  | 4.65                 | 11.9 | 37.4 | 440                  | 80.4 | 25.6 | 31.8 | 2.9   | 1.67   | 97.8  | 184   | 54    | 6.8      | 0.4   | 10.2     | 0.7     | 0.12 | 0.01  | nd       | nd  |  |
| 55        | 21   | 7.39                 | 1.66                 | 5.20                 | 0.50                 | 0.0                  | 0.0                  | 4.80                 | 12.3 | 38.7 | 442                  | 80.6 | 25.6 | 31.8 | 3.2   | 1.64   | 99.1  | 151   | 42    | 4.7      | 0.2   | 17.6     | 0.2     | 0.13 | 0.01  | nd       | nd  |  |
| 59        | 25   | 7.03                 | 2.09                 | 4.52                 | 0.39                 | 0.0                  | 0.0                  | 5.01                 | 12.8 | 40.6 | 513                  | 81.0 | 25.5 | 31.5 | 2.5   | 1.66   | 98.3  | 155   | 32    | 10.9     | 0.4   | 18.1     | 2.4     | 0.13 | 0.00  | nd       | nd  |  |
| 62        | 28   | 5.95                 | 1.14                 | 4.46                 | 0.32                 | 0.0                  | 0.0                  | 4.98                 | 12.6 | 39.8 | 462                  | 79.9 | 25.3 | 31.7 | 1.9   | 1.72   | 100.0 | 190   | 41    | 20.2     | 3.0   | 16.2     | 0.5     | 0.13 | 0.00  | nd       | nd  |  |
| 66        | 32   | 5.05                 | 0.87                 | 3.67                 | 0.42                 | 0.1                  | 0.0                  | 5.09                 | 12.8 | 40.3 | 482                  | 79.2 | 25.1 | 31.8 | 1.9   | 1.69   | 98.6  | 158   | 36    | 35.3     | 3.4   | 13.9     | 0.2     | 0.12 | 0.00  | nd       | nd  |  |
| 69        | 35   | 5.32                 | 1.95                 | 3.05                 | 0.28                 | 0.0                  | 0.0                  | 4.91                 | 12.4 | 38.5 | 471                  | 78.4 | 25.3 | 32.2 | 2.4   | 1.74   | 99.1  | 167   | 32    | 48.5     | 4.3   | 11.9     | 1.2     | 0.12 | 0.00  | nd       | nd  |  |
| 73        | 39   | 5.02                 | 1.01                 | 3.69                 | 0.26                 | 0.1                  | 0.0                  | 5.03                 | 12.6 | 39.5 | 461                  | 78.5 | 25.0 | 31.9 | 2.2   | 1.81   | 99.1  | 158   | 31    | 69.2     | 4.4   | 13.0     | 0.2     | 0.12 | 0.00  | nd       | nd  |  |
| 76        | 42   | 7.32                 | 3.00                 | 3.89                 | 0.38                 | 0.1                  | 0.0                  | 5.22                 | 12.9 | 40.8 | 403                  | 78.2 | 24.7 | 31.6 | 2.4   | 1.84   | 99.3  | 161   | 30    | 79.0     | 8.3   | 11.3     | 2.9     | 0.12 | 0.00  | nd       | nd  |  |

Baboon T6

| Challenge |      | WBC                  |                      |                      |                      |                      |                      |                      |      |      |                      |      |      |      |       | Avg    | Avg   | Avg  | serum |          | serum    |          | serum    |      | NPW   |          |          |
|-----------|------|----------------------|----------------------|----------------------|----------------------|----------------------|----------------------|----------------------|------|------|----------------------|------|------|------|-------|--------|-------|------|-------|----------|----------|----------|----------|------|-------|----------|----------|
| Age       | Day  | Total                | Neut                 | Lymph                | Mono                 | Eosin                | Baso                 | RBC                  | HGB  | HCT  | PLT                  | MCV  | MCH  | MCHC | Retic | Weight | Temp  | HR   | Resp  | anti-FHA | anti-FHA | anti-PTx | anti-PTx | ADA  | ADA   | anti-PTx | anti-PTx |
| days      | days | x10 <sup>3</sup> /μl | x10 <sup>3</sup> /μl | x10 <sup>3</sup> /μl | x10 <sup>3</sup> /μl | x10 <sup>3</sup> /μl | x10 <sup>3</sup> /μl | x10 <sup>6</sup> /μl | g/dL | %    | x10 <sup>3</sup> /μl | fL   | pg   | %    | kg    | °F     | /min  | /min | IU/ml | +/-      | μg/ml    | +/-      | rel abs  | +/-  | ng/ml | +/-      |          |
| 1         | -27  | 9.30                 | 8.03                 | 0.93                 | 0.33                 | 0.0                  | 0.0                  | 4.22                 | 12.5 | 36.5 | 369                  | 86.5 | 29.6 | 34.2 | 2.0   | nd     | nd    | nd   | nd    | 0.8      | 0.1      | 0.07     | 0.02     | 0.10 | 0.00  | nd       | nd       |
| 7         | -21  | 4.94                 | 1.69                 | 2.51                 | 0.67                 | 0.1                  | 0.0                  | 4.39                 | 12.2 | 37.6 | 346                  | 85.6 | 27.8 | 32.4 | 0.3   | nd     | nd    | nd   | nd    | 1.0      | 0.2      | 200.2    | 35.1     | 0.10 | 0.00  | nd       | nd       |
| 14        | -14  | 4.84                 | 2.06                 | 2.17                 | 0.51                 | 0.1                  | 0.0                  | 4.06                 | 11.0 | 35.2 | 457                  | 86.7 | 27.1 | 31.3 | 4.3   | nd     | nd    | nd   | nd    | 0.7      | 0.0      | 90.4     | 10.3     | 0.10 | 0.01  | nd       | nd       |
| 21        | -7   | 5.56                 | 2.27                 | 2.68                 | 0.47                 | 0.1                  | 0.0                  | 3.98                 | 10.2 | 33.4 | 379                  | 83.9 | 25.6 | 30.5 | 5.2   | nd     | nd    | nd   | nd    | 0.8      | 0.0      | 69.9     | 21.4     | 0.11 | 0.00  | nd       | nd       |
| 28        | 0    | 4.93                 | 2.97                 | 1.67                 | 0.26                 | 0.0                  | 0.0                  | 4.44                 | 11.1 | 35.9 | 443                  | 80.9 | 25.0 | 30.9 | 3.8   | 1.10   | 98.3  | 158  | 72    | 0.8      | 0.0      | 45.6     | 7.5      | 0.12 | 0.01  | nd       | nd       |
| 32        | 4    | 3.39                 | 1.13                 | 1.96                 | 0.23                 | 0.1                  | 0.0                  | 4.17                 | 10.4 | 33.1 | 352                  | 79.4 | 24.9 | 31.4 | 1.7   | 1.10   | 96.9  | 150  | 54    | 1.0      | 0.0      | 47.2     | 13.0     | 0.14 | 0.01  | 2.7      | 0.2      |
| 35        | 7    | 5.63                 | 1.71                 | 3.57                 | 0.28                 | 0.1                  | 0.0                  | 4.48                 | 11.0 | 35.3 | 423                  | 78.8 | 24.6 | 31.2 | 2.2   | 1.11   | 99.8  | 140  | 90    | 1.2      | 0.0      | 44.6     | 10.5     | 0.17 | 0.01  | nd       | nd       |
| 39        | 11   | 9.14                 | 2.19                 | 6.43                 | 0.39                 | 0.1                  | 0.0                  | 4.44                 | 10.8 | 35.9 | 441                  | 80.9 | 24.3 | 30.1 | 2.3   | 1.19   | 98.8  | 140  | 68    | 1.7      | 0.1      | 33.0     | 3.7      | 0.20 | 0.04  | nd       | nd       |
| 42        | 14   | 11.30                | 3.23                 | 7.59                 | 0.38                 | 0.1                  | 0.0                  | 4.45                 | 10.9 | 35.9 | 412                  | 80.7 | 24.5 | 30.4 | 3.4   | 1.23   | 98.0  | 146  | 62    | 14.6     | 0.7      | 26.5     | 0.6      | 0.24 | 0.04  | nd       | nd       |
| 46        | 18   | 10.80                | 5.58                 | 4.65                 | 0.51                 | 0.0                  | 0.0                  | 4.49                 | 11.0 | 35.9 | 336                  | 80.0 | 24.5 | 30.6 | 2.5   | 1.31   | 98.1  | 138  | 50    | 19.9     | 1.7      | 18.9     | 5.3      | 0.34 | 0.02  | nd       | nd       |
| 49        | 21   | 5.57                 | 1.94                 | 3.28                 | 0.30                 | 0.0                  | 0.0                  | 4.60                 | 11.2 | 36.6 | 317                  | 79.6 | 24.3 | 30.6 | 2.4   | 1.35   | 98.5  | 126  | 66    | 34.1     | 3.4      | 12.5     | 0.1      | 0.43 | 0.01  | nd       | nd       |
| 53        | 25   | 4.83                 | 1.56                 | 2.91                 | 0.30                 | 0.0                  | 0.0                  | 4.83                 | 11.7 | 38.7 | 381                  | 80.1 | 24.2 | 30.2 | 2.6   | 1.41   | 97.8  | 131  | 60    | 63.8     | 2.8      | 9.2      | 0.0      | 0.60 | 0.00  | nd       | nd       |
| 56        | 28   | 4.40                 | 1.98                 | 2.20                 | 0.20                 | 0.0                  | 0.0                  | 5.03                 | 12.2 | 39.7 | 262                  | 78.9 | 24.3 | 30.7 | 2.0   | 1.45   | 99.7  | 173  | 46    | 99.6     | 0.7      | 7.6      | 0.5      | 0.65 | 0.05  | nd       | nd       |
| 60        | 32   | 3.26                 | 1.01                 | 2.03                 | 0.18                 | 0.0                  | 0.0                  | 4.98                 | 12.1 | 38.8 | 386                  | 77.9 | 24.3 | 31.2 | 1.3   | 1.44   | 98.5  | 151  | 59    | 151.5    | 10.4     | 14.3     | 3.4      | 0.74 | 0.03  | nd       | nd       |
| 63        | 35   | 3.84                 | 1.84                 | 1.81                 | 0.17                 | 0.0                  | 0.0                  | 5.05                 | 12.2 | 39.2 | 347                  | 77.6 | 24.2 | 31.1 | 1.6   | nd     | 98.9  | 152  | 48    | 149.0    | 32.0     | 13.0     | 0.8      | 0.82 | 0.04  | nd       | nd       |
| 67        | 39   | 3.70                 | 1.39                 | 2.00                 | 0.22                 | 0.1                  | 0.0                  | 4.95                 | 11.9 | 38.8 | 340                  | 78.4 | 24.0 | 30.7 | 1.1   | nd     | 99.6  | 141  | 58    | 215.9    | 27.1     | 11.8     | 0.6      | 0.90 | 0.02  | nd       | nd       |
| 70        | 42   | 3.69                 | 1.73                 | 1.76                 | 0.18                 | 0.0                  | 0.0                  | 4.94                 | 11.8 | 38.1 | 341                  | 77.1 | 23.9 | 31.0 | 1.4   | 1.58   | 100.1 | 188  | 60    | 193.1    | 19.1     | 11.9     | 0.8      | 0.94 | 0.03  | nd       | nd       |





Baboon Y1

| Challenge |      | WBC                  |                      |                      |                      |                      |                      |                      |      |      |                      |      |      |      |       | Avg    | Avg   | Avg   | serum |          | serum |          | serum   |      | NPW   |          |     |
|-----------|------|----------------------|----------------------|----------------------|----------------------|----------------------|----------------------|----------------------|------|------|----------------------|------|------|------|-------|--------|-------|-------|-------|----------|-------|----------|---------|------|-------|----------|-----|
| Age       | Day  | Total                | Neut                 | Lymph                | Mono                 | Eosin                | Baso                 | RBC                  | HGB  | HCT  | PLT                  | MCV  | MCH  | MCHC | Retic | Weight | Temp  | HR    | Resp  | anti-FHA |       | anti-PTx |         | ADA  |       | anti-PTx |     |
| days      | days | x10 <sup>3</sup> /μl | x10 <sup>3</sup> /μl | x10 <sup>3</sup> /μl | x10 <sup>3</sup> /μl | x10 <sup>3</sup> /μl | x10 <sup>3</sup> /μl | x10 <sup>6</sup> /μl | g/dL | %    | x10 <sup>3</sup> /μl | fL   | pg   | %    | kg    | °F     | /min  | /min  | IU/ml | +/-      | μg/ml | +/-      | rel abs | +/-  | ng/ml | +/-      |     |
| 1         | -33  | nd                   | nd                   | nd                   | nd                   | nd                   | nd                   | nd                   | nd   | nd   | nd                   | nd   | nd   | nd   | nd    | 0.90   | nd    | nd    | nd    | 1.1      | 0.0   | 0.64     | 0.00    | 0.13 | 0.01  | nd       | nd  |
| 7         | -27  | nd                   | nd                   | nd                   | nd                   | nd                   | nd                   | nd                   | nd   | nd   | nd                   | nd   | nd   | nd   | nd    | nd     | nd    | nd    | nd    | 1.2      | 0.2   | 174.3    | 26.5    | 0.14 | 0.00  | nd       | nd  |
| 14        | -20  | 7.76                 | 2.44                 | 4.60                 | 0.65                 | 0.1                  | 0.0                  | 4.69                 | 14.4 | 43.0 | 424                  | 91.7 | 30.7 | 33.5 | 0.9   | nd     | nd    | nd    | nd    | 1.0      | 0.0   | 191.6    | 6.0     | 0.13 | 0.00  | nd       | nd  |
| 21        | -13  | 8.89                 | 3.21                 | 4.88                 | 0.74                 | 0.1                  | 0.0                  | 4.42                 | 13.2 | 40.1 | 381                  | 90.7 | 29.9 | 32.9 | 2.9   | nd     | nd    | nd    | nd    | 1.0      | 0.1   | 146.5    | 19.3    | 0.09 | 0.00  | nd       | nd  |
| 28        | -6   | 7.08                 | 2.61                 | 3.94                 | 0.49                 | 0.0                  | 0.0                  | 4.82                 | 14.0 | 43.0 | 431                  | 89.2 | 29.0 | 32.6 | 3.2   | nd     | nd    | nd    | nd    | 1.0      | 0.0   | 139.6    | 14.1    | 0.13 | 0.00  | nd       | nd  |
| 34        | 0    | 5.37                 | 1.87                 | 3.23                 | 0.25                 | 0.0                  | 0.0                  | 4.60                 | 12.8 | 40.1 | 430                  | 87.2 | 27.8 | 31.9 | 1.7   | 1.15   | 98.9  | 166.3 | 38.0  | 0.4      | 0.0   | 66.7     | 10.1    | 0.14 | 0.00  | nd       | nd  |
| 37        | 3    | 7.04                 | 2.26                 | 4.01                 | 0.65                 | 0.1                  | 0.0                  | 4.11                 | 11.3 | 35.2 | 345                  | 85.6 | 27.5 | 32.1 | 2.0   | 1.25   | 98.9  | 210   | 64    | 0.3      | 0.0   | 48.4     | 7.6     | 0.12 | 0.01  | 8.3      | 0.7 |
| 41        | 7    | 10.27                | 4.72                 | 5.15                 | 0.37                 | 0.0                  | 0.0                  | 4.19                 | 11.4 | 35.1 | 497                  | 83.8 | 27.2 | 32.5 | 4.8   | nd     | 98.4  | 189   | 58    | 0.2      | 0.0   | 36.0     | 8.9     | 0.13 | 0.01  | nd       | nd  |
| 44        | 10   | 11.37                | 4.20                 | 6.55                 | 0.56                 | 0.1                  | 0.0                  | 4.41                 | 11.8 | 37.6 | 575                  | 85.3 | 26.8 | 31.4 | 4.2   | 1.29   | 98.5  | 186   | 38    | 0.9      | 0.1   | 38.7     | 2.3     | 0.13 | 0.01  | nd       | nd  |
| 48        | 14   | 13.41                | 3.93                 | 8.72                 | 0.67                 | 0.1                  | 0.0                  | 4.44                 | 11.7 | 37.4 | 490                  | 84.2 | 26.4 | 31.3 | 2.6   | 1.36   | 99.4  | 194   | 38    | 1.4      | 0.1   | 78.4     | 29.4    | 0.13 | 0.00  | nd       | nd  |
| 51        | 17   | 10.31                | 3.81                 | 5.86                 | 0.57                 | 0.1                  | 0.0                  | 4.73                 | 12.3 | 39.1 | 482                  | 82.7 | 26.0 | 31.5 | 3.1   | 1.40   | 99.4  | 188   | 56    | 3.2      | 0.4   | 38.7     | 7.4     | 0.13 | 0.00  | nd       | nd  |
| 55        | 21   | 9.47                 | 3.31                 | 5.39                 | 0.69                 | 0.1                  | 0.0                  | 4.43                 | 11.6 | 36.1 | 418                  | 81.5 | 26.2 | 32.1 | 3.3   | 1.51   | 99.1  | 199   | 48    | 16.7     | 0.5   | 29.8     | 4.5     | 0.14 | 0.00  | nd       | nd  |
| 58        | 24   | 6.49                 | 2.35                 | 3.76                 | 0.37                 | 0.0                  | 0.0                  | 4.70                 | 12.2 | 38.9 | 418                  | 82.8 | 26.0 | 31.4 | 2.6   | 1.46   | 99.5  | 182   | 44    | 32.9     | 3.4   | 27.1     | 0.6     | 0.13 | 0.01  | nd       | nd  |
| 62        | 28   | 9.01                 | 3.69                 | 4.85                 | 0.44                 | 0.0                  | 0.0                  | 4.71                 | 11.9 | 38.6 | 455                  | 82.0 | 25.3 | 30.8 | 2.1   | 1.55   | 98.6  | 181   | 48    | 38.7     | 1.7   | 23.8     | 1.6     | 0.13 | 0.00  | nd       | nd  |
| 65        | 31   | 7.90                 | 2.98                 | 4.56                 | 0.30                 | 0.1                  | 0.0                  | 4.63                 | 11.8 | 38.3 | 485                  | 82.7 | 25.5 | 30.8 | 2.8   | 1.61   | 98.5  | 180   | 53    | 39.4     | 6.2   | 41.0     | 9.0     | 0.13 | 0.00  | nd       | nd  |
| 69        | 35   | 7.83                 | 2.57                 | 4.85                 | 0.32                 | 0.1                  | 0.0                  | 4.67                 | 11.8 | 38.5 | 734                  | 82.4 | 25.3 | 30.6 | 2.5   | 1.66   | 99.6  | 166   | 39    | 51.1     | 0.8   | 26.9     | 4.7     | 0.09 | 0.00  | nd       | nd  |
| 72        | 38   | 9.57                 | 3.72                 | 5.38                 | 0.39                 | 0.1                  | 0.0                  | 4.63                 | 12.0 | 38.2 | 454                  | 82.5 | 25.9 | 31.4 | 3.5   | 1.75   | nd    | nd    | nd    | 53.5     | 8.7   | 18.4     | 0.1     | 0.12 | 0.00  | nd       | nd  |
| 76        | 42   | 7.13                 | 2.08                 | 4.56                 | 0.39                 | 0.1                  | 0.0                  | 4.77                 | 12.2 | 39.2 | 492                  | 82.2 | 25.6 | 31.1 | 2.8   | 1.77   | 100.1 | 215   | 48    | 55.0     | 0.5   | 19.1     | 0.3     | 0.12 | 0.00  | nd       | nd  |

Baboon Y2

| Challenge |      | WBC                  |                      |                      |                      |                      |                      |                      |      |      |                      |      |      |      |       | Avg    | Avg   | Avg  | serum |          | serum    |       | serum    |          | NPW      |     |     |
|-----------|------|----------------------|----------------------|----------------------|----------------------|----------------------|----------------------|----------------------|------|------|----------------------|------|------|------|-------|--------|-------|------|-------|----------|----------|-------|----------|----------|----------|-----|-----|
| Age       | Day  | Total                | Neut                 | Lymph                | Mono                 | Eosin                | Baso                 | RBC                  | HGB  | HCT  | PLT                  | MCV  | MCH  | MCHC | Retic | Weight | Temp  | HR   | Resp  | anti-FHA | anti-PTx | ADA   | anti-PTx | anti-PTx | anti-PTx |     |     |
| days      | days | x10 <sup>3</sup> /μl | x10 <sup>3</sup> /μl | x10 <sup>3</sup> /μl | x10 <sup>3</sup> /μl | x10 <sup>3</sup> /μl | x10 <sup>3</sup> /μl | x10 <sup>6</sup> /μl | g/dL | %    | x10 <sup>3</sup> /μl | fL   | pg   | %    | kg    | °F     | /min  | /min | IU/ml | +/-      | μg/ml    | +/-   | rel abs  | +/-      | ng/ml    | +/- |     |
| 1         | -33  | nd                   | nd                   | nd                   | nd                   | nd                   | nd                   | nd                   | nd   | nd   | nd                   | nd   | nd   | nd   | nd    | 1.36   | nd    | nd   | nd    | 19.3     | 0.6      | 0.04  | 0.00     | 0.12     | 0.00     | nd  | nd  |
| 7         | -27  | 7.76                 | 4.56                 | 2.78                 | 0.26                 | 0.0                  | 0.1                  | 5.68                 | 16.7 | 50   | 594                  | 88   | 29.4 | 33.4 | 0.8   | nd     | nd    | nd   | nd    | 13.0     | 0.4      | 144.7 | 8.7      | 0.11     | 0.00     | nd  | nd  |
| 14        | -20  | 8.51                 | 3.40                 | 4.40                 | 0.25                 | 0.1                  | 0.4                  | 5.87                 | 16.7 | 51.0 | 516                  | 86.9 | 28.4 | 32.7 | 0.6   | nd     | nd    | nd   | nd    | 16.4     | 0.7      | 141.2 | 0.7      | 0.11     | 0.00     | nd  | nd  |
| 21        | -13  | 7.74                 | 2.37                 | 4.73                 | 0.48                 | 0.1                  | 0.0                  | 5.62                 | 15.3 | 46.9 | 420                  | 83.5 | 27.2 | 32.6 | 0.9   | nd     | nd    | nd   | nd    | 10.9     | 1.2      | 89.6  | 1.6      | 0.10     | 0.00     | nd  | nd  |
| 28        | -6   | 7.73                 | 2.91                 | 4.33                 | 0.35                 | 0.1                  | 0.0                  | 5.52                 | 14.6 | 44.9 | 344                  | 81.3 | 26.4 | 32.5 | 1.5   | nd     | nd    | nd   | nd    | 7.9      | 0.2      | 63.6  | 3.9      | 0.11     | 0.00     | nd  | nd  |
| 34        | 0    | 6.82                 | 3.01                 | 3.55                 | 0.18                 | 0.1                  | 0.0                  | 5.58                 | 14.7 | 45.6 | 329                  | 81.7 | 26.3 | 32.2 | 1.1   | 1.64   | 98.7  | 158  | 51    | 6.9      | 0.7      | 58.2  | 8.4      | 0.11     | 0.00     | nd  | nd  |
| 37        | 3    | 8.07                 | 2.82                 | 4.75                 | 0.32                 | 0.2                  | 0.0                  | 5.32                 | 13.9 | 41.6 | 319                  | 78.2 | 26.1 | 33.4 | 0.6   | 1.65   | 99.3  | 180  | 56    | 8.9      | 0.2      | 45.7  | 7.5      | 0.11     | 0.00     | 4.7 | 0.2 |
| 41        | 7    | 6.13                 | 1.72                 | 4.21                 | 0.14                 | 0.0                  | 0.0                  | 5.03                 | 13.1 | 39.7 | 327                  | 78.9 | 26.0 | 33.0 | 1.2   | 1.67   | 97.9  | 159  | 43    | 7.1      | 0.2      | 44.1  | 1.2      | 0.11     | 0.00     | nd  | nd  |
| 44        | 10   | 7.96                 | 2.61                 | 5.06                 | 0.20                 | 0.1                  | 0.0                  | 4.90                 | 12.6 | 39.0 | 264                  | 79.6 | 25.7 | 32.3 | 2.0   | 1.74   | 96.8  | 170  | 75    | 6.5      | 0.1      | 74.1  | 8.6      | 0.10     | 0.01     | nd  | nd  |
| 48        | 14   | 15.14                | 7.96                 | 6.62                 | 0.41                 | 0.0                  | 0.1                  | 4.98                 | 12.9 | 40.3 | 291                  | 80.9 | 25.9 | 32.0 | 2.1   | 1.81   | 96.5  | 143  | 48    | 8.6      | 0.0      | 68.6  | 1.9      | 0.07     | 0.00     | nd  | nd  |
| 51        | 17   | 8.49                 | 3.23                 | 4.91                 | 0.27                 | 0.1                  | 0.0                  | 4.70                 | 12.0 | 37.1 | 322                  | 78.9 | 25.5 | 32.3 | 2.0   | 1.83   | 96.7  | 155  | 48    | 15.8     | 2.1      | 61.8  | 7.4      | 0.10     | 0.00     | nd  | nd  |
| 55        | 21   | 9.89                 | 2.81                 | 6.57                 | 0.41                 | 0.1                  | 0.0                  | 4.90                 | 12.0 | 37.8 | 350                  | 77.1 | 24.5 | 31.7 | 1.6   | 1.99   | 98.7  | 211  | 65    | 30.5     | 3.4      | 59.1  | 1.4      | 0.11     | 0.00     | nd  | nd  |
| 58        | 24   | 5.58                 | 1.70                 | 3.63                 | 0.15                 | 0.0                  | 0.1                  | 4.84                 | 12.3 | 37.8 | 324                  | 78.1 | 25.4 | 32.5 | 1.9   | 1.91   | 97.4  | 137  | 42    | 37.4     | 3.3      | 38.4  | 0.6      | 0.10     | 0.00     | nd  | nd  |
| 62        | 28   | 5.87                 | 1.64                 | 3.90                 | 0.19                 | 0.1                  | 0.1                  | 5.05                 | 12.8 | 39.1 | 317                  | 77.4 | 25.3 | 32.7 | 1.8   | 1.98   | 97.6  | 160  | 64    | 54.4     | 1.7      | 21.2  | 1.0      | 0.10     | 0.00     | nd  | nd  |
| 65        | 31   | 4.60                 | 2.26                 | 2.17                 | 0.16                 | 0.0                  | 0.0                  | 4.90                 | 12.3 | 38.1 | 263                  | 77.8 | 25.1 | 32.3 | 2.2   | 2.02   | 100.2 | 151  | 36    | 59.5     | 7.8      | 19.5  | 3.4      | 0.10     | 0.00     | nd  | nd  |
| 69        | 35   | 7.41                 | 2.82                 | 4.15                 | 0.37                 | 0.1                  | 0.0                  | 4.86                 | 12.4 | 37.0 | 300                  | 76.1 | 25.5 | 33.5 | 1.6   | 2.09   | 100.7 | 174  | 38    | 75.2     | 1.1      | 15.6  | 2.3      | 0.10     | 0.00     | nd  | nd  |
| 72        | 38   | 4.56                 | 1.41                 | 2.76                 | 0.19                 | 0.1                  | 0.1                  | 4.98                 | 12.8 | 38.4 | 332                  | 77.1 | 25.7 | 33.3 | 1.6   | 2.06   | 98.4  | 144  | 42.7  | 88.6     | 0.5      | 16.7  | 1.5      | 0.10     | 0.00     | nd  | nd  |
| 76        | 42   | 5.90                 | 1.52                 | 3.98                 | 0.29                 | 0.1                  | 0.0                  | 4.79                 | 12.2 | 36.1 | 358                  | 75.4 | 25.5 | 33.8 | 1.2   | 2.16   | 98.6  | 178  | 41    | 93.5     | 6.9      | 11.5  | 0.5      | 0.10     | 0.00     | nd  | nd  |

Baboon Y3

| Challenge |      | WBC                  |                      |                      |                      |                      |                      |                      |      |      |                      |      |      |      |       | Avg    | Avg  | Avg  | serum |          | serum    |          | serum   |      | NPW      |          |     |
|-----------|------|----------------------|----------------------|----------------------|----------------------|----------------------|----------------------|----------------------|------|------|----------------------|------|------|------|-------|--------|------|------|-------|----------|----------|----------|---------|------|----------|----------|-----|
| Age       | Day  | Total                | Neut                 | Lymph                | Mono                 | Eosin                | Baso                 | RBC                  | HGB  | HCT  | PLT                  | MCV  | MCH  | MCHC | Retic | Weight | Temp | HR   | Resp  | anti-FHA | anti-PTx | anti-PTx | ADA     | ADA  | anti-PTx | anti-PTx |     |
| days      | days | x10 <sup>3</sup> /μl | x10 <sup>3</sup> /μl | x10 <sup>3</sup> /μl | x10 <sup>3</sup> /μl | x10 <sup>3</sup> /μl | x10 <sup>3</sup> /μl | x10 <sup>6</sup> /μl | g/dL | %    | x10 <sup>3</sup> /μl | fL   | pg   | %    | kg    | °F     | /min | /min | IU/ml | +/-      | μg/ml    | +/-      | rel abs | +/-  | ng/ml    | +/-      |     |
| 2         | -32  | nd                   | nd                   | nd                   | nd                   | nd                   | nd                   | nd                   | nd   | nd   | nd                   | nd   | nd   | nd   | nd    | 0.85   | nd   | nd   | nd    | 0.5      | 0.0      | 0.03     | 0.00    | 0.11 | 0.00     | nd       | nd  |
| 10        | -24  | 5.83                 | 1.96                 | 3.36                 | 0.45                 | 0.1                  | 0.0                  | 5.78                 | 15.3 | 48.2 | 421                  | 83.4 | 26.5 | 31.7 | 0.32  | nd     | nd   | nd   | nd    | 0.4      | 0.0      | 224.5    | 10.8    | 0.11 | 0.00     | nd       | nd  |
| 17        | -17  | 8.94                 | 3.39                 | 5.02                 | 0.42                 | 0.1                  | 0.0                  | 5.49                 | 14.3 | 45.3 | 343                  | 82.5 | 26.0 | 31.6 | 1.2   | nd     | nd   | nd   | nd    | 0.4      | 0.0      | 220.4    | 50.8    | 0.11 | 0.01     | nd       | nd  |
| 24        | -10  | 6.80                 | 2.34                 | 4.00                 | 0.39                 | 0.1                  | 0.0                  | 5.18                 | 13.2 | 42.1 | 356                  | 81.3 | 25.5 | 31.4 | 3.0   | nd     | nd   | nd   | nd    | 0.4      | 0.0      | 117.1    | 7.2     | 0.12 | 0.00     | nd       | nd  |
| 31        | -3   | 6.43                 | 2.15                 | 3.91                 | 0.26                 | 0.1                  | 0.0                  | 5.26                 | 13.2 | 42.9 | 385                  | 81.6 | 25.1 | 30.8 | 2.8   | nd     | nd   | nd   | nd    | 0.5      | 0.0      | 94.3     | 6.3     | 0.13 | 0.00     | nd       | nd  |
| 34        | 0    | 5.54                 | 2.23                 | 2.97                 | 0.18                 | 0.0                  | 0.1                  | 4.66                 | 11.7 | 36.9 | 478                  | 79.2 | 25.1 | 31.7 | 3.1   | 1.15   | 99.4 | 184  | 57    | 0.6      | 0.0      | 105.9    | 20.5    | 0.16 | 0.00     | nd       | nd  |
| 38        | 4    | 6.71                 | 1.86                 | 4.14                 | 0.54                 | 0.1                  | 0.1                  | 4.40                 | 11.0 | 34.6 | 348                  | 78.6 | 25.0 | 31.8 | 4.8   | 1.29   | 99.7 | 211  | 66    | 0.8      | 0.0      | 84.0     | 10.0    | 0.17 | 0.00     | 27.2     | 5.1 |
| 41        | 7    | 5.69                 | 2.08                 | 3.23                 | 0.31                 | 0.0                  | 0.0                  | 4.76                 | 11.7 | 37.1 | 433                  | 78.1 | 24.5 | 31.4 | 5.6   | 1.25   | 98.0 | 188  | 69    | 0.7      | 0.0      | 66.2     | 9.6     | 0.17 | 0.00     | nd       | nd  |
| 45        | 11   | 6.65                 | 2.33                 | 3.97                 | 0.28                 | 0.0                  | 0.1                  | 4.90                 | 12.1 | 38.3 | 407                  | 78.2 | 24.7 | 31.6 | 4.2   | 1.29   | 98.3 | 202  | 62    | 0.9      | 0.0      | 58.6     | 2.8     | 0.15 | 0.00     | nd       | nd  |
| 48        | 14   | 8.14                 | 2.55                 | 5.16                 | 0.37                 | 0.1                  | 0.0                  | 4.85                 | 11.8 | 38.1 | 525                  | 78.6 | 24.3 | 31.0 | 3.4   | 1.38   | 99.1 | 216  | 54    | 1.6      | 0.0      | 67.2     | 4.5     | 0.16 | 0.00     | nd       | nd  |
| 52        | 18   | 8.27                 | 2.21                 | 5.57                 | 0.36                 | 0.1                  | 0.1                  | 4.98                 | 12.4 | 39.3 | 511                  | 78.9 | 24.9 | 31.6 | 4.5   | 1.48   | 99.4 | 231  | 66    | 4.7      | 0.1      | 56.0     | 0.5     | 0.17 | 0.00     | nd       | nd  |
| 55        | 21   | 6.94                 | 3.44                 | 3.18                 | 0.30                 | 0.0                  | 0.0                  | 5.18                 | 12.6 | 41.2 | 449                  | 79.5 | 24.3 | 30.6 | 3.7   | 1.48   | 98.5 | 215  | 66    | 12.6     | 0.2      | 41.8     | 0.1     | 0.19 | 0.01     | nd       | nd  |
| 59        | 25   | 6.90                 | 2.35                 | 4.12                 | 0.39                 | 0.0                  | 0.0                  | 5.03                 | 12.2 | 39.2 | 447                  | 77.9 | 24.3 | 31.1 | 2.4   | 1.60   | 98.7 | 214  | 58    | 25.4     | 0.3      | 36.9     | 1.2     | 0.19 | 0.00     | nd       | nd  |
| 62        | 28   | 5.30                 | 1.79                 | 3.24                 | 0.25                 | 0.0                  | 0.0                  | 5.23                 | 12.8 | 41.2 | 504                  | 78.8 | 24.5 | 31.1 | 2.9   | 1.61   | 99.1 | 225  | 72    | 40.9     | 1.7      | 33.7     | 6.8     | 0.18 | 0.01     | nd       | nd  |
| 66        | 32   | 5.66                 | 1.39                 | 3.95                 | 0.29                 | 0.0                  | 0.0                  | 5.50                 | 13.5 | 43.0 | 429                  | 78.2 | 24.5 | 31.4 | 2.6   | 1.71   | 98.7 | 215  | 72    | 59.9     | 3.2      | 37.5     | 2.2     | 0.19 | 0.00     | nd       | nd  |
| 69        | 35   | 4.59                 | 1.74                 | 2.59                 | 0.25                 | 0.0                  | 0.0                  | 5.31                 | 12.8 | 41.4 | 465                  | 78.0 | 24.1 | 30.9 | 2.1   | 1.70   | 97.9 | 169  | 50    | 63.4     | 5.7      | 15.1     | 1.5     | 0.19 | 0.00     | nd       | nd  |
| 72        | 38   | 4.92                 | 2.75                 | 1.97                 | 0.17                 | 0.0                  | 0.0                  | 5.27                 | 12.8 | 40.8 | 464                  | 77.4 | 24.3 | 31.4 | 2.7   | 1.69   | 98.4 | 188  | 42    | 61.0     | 2.7      | 14.5     | 5.1     | 0.19 | 0.00     | nd       | nd  |
| 76        | 42   | 6.50                 | 1.98                 | 4.14                 | 0.33                 | 0.0                  | 0.0                  | 5.53                 | 13.3 | 43.2 | 421                  | 78.1 | 24.1 | 30.8 | 1.8   | nd     | 98.5 | 204  | 40    | 66.8     | 1.6      | 9.5      | 0.0     | 0.18 | 0.00     | nd       | nd  |

Baboon Y4

| Challenge |      | WBC                  |                      |                      |                      |                      |                      |                      |      |      |                      |      |      |      |       | Avg    | Avg  | Avg  | serum |          | serum    |          | serum   |      | NPW      |          |     |
|-----------|------|----------------------|----------------------|----------------------|----------------------|----------------------|----------------------|----------------------|------|------|----------------------|------|------|------|-------|--------|------|------|-------|----------|----------|----------|---------|------|----------|----------|-----|
| Age       | Day  | Total                | Neut                 | Lymph                | Mono                 | Eosin                | Baso                 | RBC                  | HGB  | HCT  | PLT                  | MCV  | MCH  | MCHC | Retic | Weight | Temp | HR   | Resp  | anti-FHA | anti-PTx | anti-PTx | ADA     | ADA  | anti-PTx | anti-PTx |     |
| days      | days | x10 <sup>3</sup> /μl | x10 <sup>3</sup> /μl | x10 <sup>3</sup> /μl | x10 <sup>3</sup> /μl | x10 <sup>3</sup> /μl | x10 <sup>3</sup> /μl | x10 <sup>6</sup> /μl | g/dL | %    | x10 <sup>3</sup> /μl | fL   | pg   | %    | kg    | °F     | /min | /min | IU/ml | +/-      | μg/ml    | +/-      | rel abs | +/-  | ng/ml    | +/-      |     |
| 2         | -29  | 9.12                 | 7.00                 | 1.37                 | 0.73                 | 0.0                  | 0.0                  | 5.49                 | 16.6 | 51.3 | 419                  | 93.4 | 30.2 | 32.4 | 2.2   | nd     | 98.0 | 131  | 36    | 0.5      | 0.0      | 0.1      | 0.0     | 0.12 | 0.00     | nd       | nd  |
| 7         | -24  | 5.66                 | 1.65                 | 3.32                 | 0.61                 | 0.1                  | 0.0                  | 5.39                 | 15.9 | 48.2 | 484                  | 89.4 | 29.5 | 33.0 | 0.4   | nd     | nd   | nd   | nd    | 0.3      | 0.0      | 272.7    | 28.4    | 0.11 | 0.00     | nd       | nd  |
| 14        | -17  | 8.28                 | 2.70                 | 5.01                 | 0.47                 | 0.1                  | 0.0                  | 5.05                 | 14.4 | 44.5 | 574                  | 88.1 | 28.5 | 32.4 | 1.4   | nd     | nd   | nd   | nd    | 0.4      | 0.0      | 215.4    | 42.7    | 0.11 | 0.00     | nd       | nd  |
| 21        | -10  | 7.97                 | 1.39                 | 5.81                 | 0.68                 | 0.1                  | 0.0                  | 4.94                 | 13.7 | 41.9 | 100                  | 84.8 | 27.7 | 32.7 | 1.3   | nd     | nd   | nd   | nd    | 0.6      | 0.1      | 130.6    | 19.6    | 0.14 | 0.00     | nd       | nd  |
| 28        | -3   | 8.6                  | 1.32                 | 6.75                 | 0.45                 | 0.1                  | 0.0                  | 4.89                 | 13.3 | 41.1 | 400                  | 84.0 | 27.2 | 32.4 | 1.1   | nd     | nd   | nd   | nd    | 1.1      | 0.1      | 95.0     | 6.2     | 0.15 | 0.00     | nd       | nd  |
| 31        | 0    | 9.61                 | 5.62                 | 3.46                 | 0.39                 | 0.0                  | 0.1                  | 4.24                 | 11.4 | 34.3 | 430                  | 80.9 | 26.9 | 33.2 | 1.3   | 1.19   | 98.0 | 154  | 63    | 0.3      | 0.0      | 105.5    | 9.0     | 0.16 | 0.00     | nd       | nd  |
| 35        | 4    | 8.05                 | 2.04                 | 5.21                 | 0.69                 | 0.0                  | 0.1                  | 3.99                 | 10.7 | 32.2 | 433                  | 80.7 | 26.8 | 33.2 | 2.2   | 1.28   | 99.7 | 185  | 52    | 0.5      | 0.0      | 76.8     | 7.5     | 0.17 | 0.01     | 2.4      | 0.2 |
| 38        | 7    | 8.5                  | 3.44                 | 4.57                 | 0.43                 | 0.0                  | 0.0                  | 4.01                 | 10.5 | 31.7 | 407                  | 79.1 | 26.2 | 33.1 | 3.4   | 1.28   | 97.3 | 154  | 69    | 0.6      | 0.0      | 57.8     | 5.3     | 0.15 | 0.00     | nd       | nd  |
| 42        | 11   | 8.25                 | 1.73                 | 6.17                 | 0.32                 | 0.0                  | 0.0                  | 4.17                 | 10.8 | 33.3 | 422                  | 79.9 | 25.9 | 32.4 | 3.3   | 1.35   | 97.5 | 142  | 64    | 0.4      | 0.0      | 49.0     | 1.8     | 0.18 | 0.00     | nd       | nd  |
| 45        | 14   | 10.53                | 2.57                 | 7.42                 | 0.48                 | 0.0                  | 0.0                  | 4.18                 | 10.8 | 33.6 | 443                  | 80.4 | 25.8 | 32.1 | 3.5   | 1.41   | 98.9 | 193  | 90    | 0.9      | 0.1      | 71.2     | 11.8    | 0.21 | 0.00     | nd       | nd  |
| 49        | 18   | 12.16                | 4.10                 | 7.54                 | 0.40                 | 0.0                  | 0.1                  | 3.97                 | 10.4 | 31.3 | 473                  | 78.8 | 26.2 | 33.2 | 2.9   | 1.48   | 99.6 | 196  | 60    | 1.6      | 0.7      | 49.5     | 1.6     | 0.22 | 0.03     | nd       | nd  |
| 52        | 21   | 8.78                 | 2.63                 | 5.76                 | 0.35                 | 0.0                  | 0.0                  | 4.19                 | 10.7 | 33.3 | 469                  | 79.5 | 25.5 | 32.1 | 2.7   | 1.55   | 98.6 | 183  | 70    | 3.5      | 0.0      | 56.7     | 6.9     | 0.16 | 0.00     | nd       | nd  |
| 56        | 25   | 6.42                 | 1.69                 | 4.43                 | 0.27                 | 0.0                  | 0.0                  | 4.41                 | 11.2 | 34.8 | 498                  | 78.9 | 25.4 | 32.2 | 2.7   | 1.57   | 98.3 | 187  | 56    | 6.8      | 0.1      | 91.0     | 7.8     | 0.15 | 0.02     | nd       | nd  |
| 59        | 28   | 5.59                 | 1.37                 | 3.88                 | 0.31                 | 0.0                  | 0.0                  | 4.39                 | 11.3 | 34.6 | 509                  | 78.8 | 25.7 | 32.7 | 2.2   | 1.59   | 97.7 | 183  | 54    | 20.2     | 0.1      | 66.6     | 1.7     | 0.16 | 0.01     | nd       | nd  |
| 63        | 32   | 8.03                 | 2.04                 | 5.47                 | 0.45                 | 0.0                  | 0.0                  | 4.58                 | 11.7 | 35.3 | 436                  | 77.1 | 25.5 | 33.1 | 1.8   | 1.74   | 98.4 | 158  | 64    | 32.1     | 1.9      | 57.1     | 3.2     | 0.16 | 0.01     | nd       | nd  |
| 66        | 35   | 5.4                  | 1.46                 | 3.67                 | 0.26                 | 0.0                  | 0.0                  | 4.46                 | 11.4 | 35.0 | 510                  | 78.5 | 25.6 | 32.6 | 2.2   | 1.68   | 97.9 | 175  | 42    | 41.9     | 1.2      | 48.2     | 2.0     | 0.16 | 0.00     | nd       | nd  |
| 69        | 38   | 5.11                 | 1.33                 | 3.56                 | 0.19                 | 0.0                  | 0.0                  | 4.45                 | 11.2 | 34.3 | 500                  | 77.1 | 25.2 | 32.7 | 2.3   | 1.70   | 97.9 | 156  | 42    | 41.0     | 1.0      | 44.5     | 1.5     | 0.15 | 0.01     | nd       | nd  |
| 73        | 42   | 6.09                 | 1.27                 | 4.57                 | 0.21                 | 0.0                  | 0.0                  | 4.47                 | 11.3 | 34.8 | 510                  | 77.9 | 25.3 | 32.5 | 1.4   | nd     | 98.1 | 155  | 38    | 54.5     | 3.8      | 45.2     | 0.4     | 0.14 | 0.00     | nd       | nd  |



Baboon Y5

| Challenge |      | WBC                  |                      |                      |                      |                      |                      |                      |      |      |                      |       |      |      |       | Avg    | Avg  | Avg  | serum |          | serum    |          | serum    |      | NPW   |          |          |
|-----------|------|----------------------|----------------------|----------------------|----------------------|----------------------|----------------------|----------------------|------|------|----------------------|-------|------|------|-------|--------|------|------|-------|----------|----------|----------|----------|------|-------|----------|----------|
| Age       | Day  | Total                | Neut                 | Lymph                | Mono                 | Eosin                | Baso                 | RBC                  | HGB  | HCT  | PLT                  | MCV   | MCH  | MCHC | Retic | Weight | Temp | HR   | Resp  | anti-FHA | anti-FHA | anti-PTx | anti-PTx | ADA  | ADA   | anti-PTx | anti-PTx |
| days      | days | x10 <sup>3</sup> /μl | x10 <sup>3</sup> /μl | x10 <sup>3</sup> /μl | x10 <sup>3</sup> /μl | x10 <sup>3</sup> /μl | x10 <sup>3</sup> /μl | x10 <sup>6</sup> /μl | g/dL | %    | x10 <sup>3</sup> /μl | fL    | pg   | %    | kg    | °F     | /min | /min | IU/ml | +/-      | μg/ml    | +/-      | rel abs  | +/-  | ng/ml | +/-      |          |
| 1         | -34  | 13.12                | 10.69                | 1.01                 | 1.40                 | 0.0                  | 0.0                  | 4.55                 | 16.2 | 45.6 | 197                  | 100.0 | 35.6 | 35.5 | 9.0   | 1.22   | 96.7 | 160  | 56    | 0.5      | 0.0      | 0.2      | 0.0      | 0.13 | 0.00  | nd       | nd       |
| 7         | -28  | nd                   | nd                   | nd                   | nd                   | nd                   | nd                   | nd                   | nd   | nd   | nd                   | nd    | nd   | nd   | nd    | nd     | nd   | nd   | nd    | 0.4      | 0.0      | 296.0    | 7.1      | 0.12 | 0.00  | nd       | nd       |
| 13        | -22  | nd                   | nd                   | nd                   | nd                   | nd                   | nd                   | nd                   | nd   | nd   | nd                   | nd    | nd   | nd   | nd    | nd     | nd   | nd   | nd    | 0.5      | 0.0      | 253.9    | 33.6     | 0.14 | 0.00  | nd       | nd       |
| 21        | -14  | nd                   | nd                   | nd                   | nd                   | nd                   | nd                   | nd                   | nd   | nd   | nd                   | nd    | nd   | nd   | nd    | nd     | nd   | nd   | nd    | 0.4      | 0.0      | 242.5    | 8.3      | 0.20 | 0.01  | nd       | nd       |
| 28        | -7   | nd                   | nd                   | nd                   | nd                   | nd                   | nd                   | nd                   | nd   | nd   | nd                   | nd    | nd   | nd   | nd    | nd     | nd   | nd   | nd    | 0.3      | 0.0      | 146.8    | 12.5     | 0.31 | 0.03  | nd       | nd       |
| 35        | 0    | 7.05                 | 3.15                 | 3.82                 | 0.01                 | 0.0                  | 0.0                  | 5.01                 | 13.1 | 39.8 | 382                  | 79.4  | 26.1 | 32.9 | 4.1   | 1.59   | 99.4 | 157  | 44    | 0.2      | 0.1      | 61.6     | 4.8      | 0.48 | 0.03  | nd       | nd       |
| 38        | 3    | 11.88                | 3.12                 | 8.24                 | 0.46                 | 0.0                  | 0.0                  | 5.24                 | 13.5 | 41.6 | 348                  | 79.4  | 25.8 | 32.5 | 3.2   | 1.63   | 98.8 | 194  | 64    | 0.7      | 0.0      | 26.9     | 0.2      | 0.49 | 0.00  | 1.3      | 0.0      |
| 42        | 7    | 26.61                | 5.08                 | 20.46                | 0.82                 | 0.2                  | 0.1                  | 5.15                 | 13.2 | 41.1 | 391                  | 79.8  | 25.6 | 32.1 | 3.7   | 1.69   | 98.7 | 176  | 62    | 0.7      | 0.0      | 1.0      | 0.0      | 0.52 | 0.03  | nd       | nd       |
| 45        | 10   | 33.28                | 7.55                 | 24.86                | 0.63                 | 0.2                  | 0.0                  | 4.72                 | 12.0 | 37.8 | 383                  | 80.1  | 25.4 | 31.7 | 3.9   | 1.78   | 98.4 | 187  | 72    | 1.1      | 0.0      | 0.2      | 0.0      | 0.51 | 0.02  | nd       | nd       |
| 49        | 14   | 38.39                | 9.75                 | 27.10                | 1.27                 | 0.2                  | 0.1                  | 4.91                 | 12.5 | 39.3 | 370                  | 80.0  | 25.5 | 31.8 | 3.4   | 1.80   | 98.9 | 165  | 52    | 13.9     | 0.7      | 0.7      | 0.1      | 0.51 | 0.02  | nd       | nd       |
| 52        | 17   | 26.51                | 8.75                 | 16.57                | 1.11                 | 0.1                  | 0.0                  | 5.05                 | 12.8 | 40.5 | 396                  | 80.2  | 25.3 | 31.6 | 3.6   | 1.88   | 98.5 | 190  | 58    | 38.4     | 1.2      | 10.5     | 0.8      | 0.59 | 0.01  | nd       | nd       |
| 56        | 21   | 13.04                | 4.58                 | 7.84                 | 0.55                 | 0.0                  | 0.0                  | 4.77                 | 11.9 | 37.3 | 447                  | 78.2  | 24.9 | 31.9 | 2.9   | 1.86   | 98.6 | 180  | 43    | 108.6    | 3.6      | 62.6     | 2.2      | 0.59 | 0.00  | nd       | nd       |
| 59        | 24   | 13.92                | 7.14                 | 6.17                 | 0.58                 | 0.0                  | 0.0                  | 4.74                 | 11.9 | 36.7 | 498                  | 77.4  | 25.1 | 32.4 | 2.1   | 1.90   | 98.3 | 172  | 38    | 153.9    | 0.6      | 62.4     | 5.4      | 0.58 | 0.00  | nd       | nd       |
| 63        | 28   | 8.35                 | 3.83                 | 4.16                 | 0.30                 | 0.0                  | 0.0                  | 4.95                 | 12.4 | 38.3 | 496                  | 77.4  | 25.1 | 32.4 | 3.5   | 1.96   | 98.7 | 170  | 44    | 180.9    | 3.3      | 55.8     | 4.1      | 0.57 | 0.01  | nd       | nd       |
| 66        | 31   | 12.74                | 9.53                 | 2.79                 | 0.39                 | 0.0                  | 0.0                  | 4.74                 | 11.8 | 37.2 | 453                  | 78.5  | 24.9 | 31.7 | 2.9   | 2.00   | 98.7 | 177  | 44    | 151.2    | 13.2     | 48.5     | 7.6      | 0.56 | 0.01  | nd       | nd       |
| 70        | 35   | 7.66                 | 5.38                 | 2.01                 | 0.25                 | 0.0                  | 0.0                  | 4.91                 | 12.2 | 38.3 | 387                  | 78.0  | 24.8 | 31.9 | 2.8   | 2.04   | 98.8 | 163  | 34    | 138.6    | 20.2     | 42.4     | 2.5      | 0.54 | 0.03  | nd       | nd       |
| 73        | 38   | 6.87                 | 2.96                 | 3.66                 | 0.23                 | 0.0                  | 0.0                  | 4.99                 | 12.2 | 38.8 | 383                  | 77.8  | 24.4 | 31.4 | 2.6   | nd     | 99.1 | 139  | 36    | 207.3    | 11.1     | 34.5     | 2.6      | 0.55 | 0.03  | nd       | nd       |
| 77        | 42   | 9.74                 | 8.14                 | 1.43                 | 0.17                 | 0.0                  | 0.0                  | 4.92                 | 12.1 | 38.3 | 356                  | 77.8  | 24.6 | 31.6 | 2.7   | nd     | 98.7 | 173  | 34    | 195.6    | 8.8      | 26.1     | 0.5      | 0.55 | 0.01  | nd       | nd       |

Baboon Y6

| Challenge |      | WBC                  |                      |                      |                      |                      |                      |                      |       |       |                      |       |       |       |       | Avg    | Avg   | Avg    | serum |          | serum |          | serum |         | NPW  |          |     |
|-----------|------|----------------------|----------------------|----------------------|----------------------|----------------------|----------------------|----------------------|-------|-------|----------------------|-------|-------|-------|-------|--------|-------|--------|-------|----------|-------|----------|-------|---------|------|----------|-----|
| Age       | Day  | Total                | Neut                 | Lymph                | Mono                 | Eosin                | Baso                 | RBC                  | HGB   | HCT   | PLT                  | MCV   | MCH   | MCHC  | Retic | Weight | Temp  | HR     | Resp  | anti-FHA |       | anti-PTx |       | ADA     |      | anti-PTx |     |
| days      | days | x10 <sup>3</sup> /μl | x10 <sup>3</sup> /μl | x10 <sup>3</sup> /μl | x10 <sup>3</sup> /μl | x10 <sup>3</sup> /μl | x10 <sup>3</sup> /μl | x10 <sup>6</sup> /μl | g/dL  | %     | x10 <sup>3</sup> /μl | fL    | pg    | %     | %     | kg     | °F    | /min   | /min  | IU/ml    | +/-   | μg/ml    | +/-   | rel abs | +/-  | ng/ml    | +/- |
| 1         | -28  | 8.98                 | 7.35                 | 1.07                 | 0.55                 | 0.0                  | 0.0                  | 4.44                 | 13.9  | 40.7  | 370                  | 91.7  | 31.3  | 34.2  | 2.8   | 0.76   | 98.0  | 144    | 52    | 1.3      | 0.1   | 0.6      | 0.0   | 0.13    | 0.00 | nd       | nd  |
| 7         | -22  | nd                   | nd                   | nd                   | nd                   | nd                   | nd                   | nd                   | nd    | nd    | nd                   | nd    | nd    | nd    | nd    | nd     | nd    | nd     | nd    | 1.0      | 0.0   | 342.1    | 5.8   | 0.13    | 0.00 | nd       | nd  |
| 15        | -14  | nd                   | nd                   | nd                   | nd                   | nd                   | nd                   | nd                   | nd    | nd    | nd                   | nd    | nd    | nd    | nd    | nd     | nd    | nd     | nd    | 0.7      | 0.0   | 208.9    | 4.1   | 0.13    | 0.00 | nd       | nd  |
| 22        | -7   | nd                   | nd                   | nd                   | nd                   | nd                   | nd                   | nd                   | nd    | nd    | nd                   | nd    | nd    | nd    | nd    | nd     | nd    | nd     | nd    | 0.5      | 0.0   | 162.4    | 9.3   | 0.10    | 0.02 | nd       | nd  |
| 29        | 0    | 5.43                 | 1.94                 | 3.14                 | 0.30                 | 0.0                  | 0.0                  | 4.36                 | 11.60 | 34.60 | 494.00               | 79.40 | 26.60 | 33.50 | 2.07  | 1.02   | 99.80 | 150.00 | 42.00 | 0.6      | 0.0   | 115.5    | 13.8  | 0.15    | 0.00 | nd       | nd  |
| 32        | 3    | 7.95                 | 3.39                 | 3.48                 | 0.97                 | 0.1                  | 0.0                  | 4.36                 | 11.1  | 34.1  | 397                  | 78.2  | 25.5  | 32.6  | 1.4   | 1.05   | 98.7  | 172    | 56    | 3.6      | 0.2   | 108.6    | 13.4  | 0.15    | 0.01 | 0.9      | 0.1 |
| 36        | 7    | 8.96                 | 3.21                 | 4.92                 | 0.76                 | 0.0                  | 0.0                  | 4.39                 | 11.1  | 34.7  | 443                  | 79.0  | 25.3  | 32.0  | 3.9   | 1.10   | 99.0  | 191    | 60    | 3.3      | 0.0   | 85.5     | 4.7   | 0.16    | 0.00 | nd       | nd  |
| 39        | 10   | 13.75                | 6.23                 | 6.75                 | 0.70                 | 0.1                  | 0.0                  | 4.73                 | 11.7  | 37.4  | 466                  | 79.1  | 24.7  | 31.3  | 3.8   | 1.10   | 98.9  | 155    | 38    | 3.4      | 0.1   | 83.5     | 2.8   | 0.16    | 0.00 | nd       | nd  |
| 43        | 14   | 13.53                | 3.99                 | 8.70                 | 0.77                 | 0.1                  | 0.0                  | 4.55                 | 11.4  | 36.0  | 442                  | 79.1  | 25.1  | 31.7  | 3.9   | 1.19   | 99.2  | 159    | 38    | 3.5      | 0.2   | 75.2     | 12.3  | 0.14    | 0.00 | nd       | nd  |
| 46        | 17   | 10.75                | 3.03                 | 7.18                 | 0.48                 | 0.1                  | 0.0                  | 4.78                 | 11.8  | 37.7  | 465                  | 78.9  | 24.7  | 31.3  | 3.4   | 1.22   | 99.1  | 172    | 42    | 4.7      | 0.0   | 59.4     | 6.5   | 0.14    | 0.00 | nd       | nd  |
| 50        | 21   | 9.86                 | 5.24                 | 4.15                 | 0.40                 | 0.0                  | 0.0                  | 4.96                 | 12.2  | 38.2  | 487                  | 77.0  | 24.6  | 31.9  | 2.2   | 1.24   | 98.7  | 158    | 42    | 13.8     | 0.4   | 46.1     | 0.8   | 0.14    | 0.01 | nd       | nd  |
| 53        | 24   | 7.73                 | 2.72                 | 4.54                 | 0.43                 | 0.0                  | 0.0                  | 5.09                 | 12.4  | 39.0  | 421                  | 76.6  | 24.4  | 31.8  | 1.8   | 1.28   | 98.3  | 140    | 40    | 17.3     | 1.4   | 51.3     | 8.3   | 0.13    | 0.01 | nd       | nd  |
| 57        | 28   | 6.15                 | 2.51                 | 3.28                 | 0.33                 | 0.0                  | 0.0                  | 4.91                 | 11.9  | 37.2  | 428                  | 75.8  | 24.2  | 32.0  | 2.1   | 1.30   | 98.5  | 138    | 40    | 22.2     | 1.3   | 50.9     | 6.6   | 0.14    | 0.01 | nd       | nd  |
| 60        | 31   | 7.46                 | 3.45                 | 3.53                 | 0.46                 | 0.0                  | 0.0                  | 4.97                 | 12.1  | 37.8  | 420                  | 76.1  | 24.3  | 32.0  | 2.1   | 1.33   | 98.9  | 166    | 40    | 33.3     | 2.2   | 40.1     | 1.9   | 0.13    | 0.00 | nd       | nd  |
| 64        | 35   | 7.13                 | 3.44                 | 3.23                 | 0.44                 | 0.0                  | 0.0                  | 5.32                 | 12.7  | 40.0  | 414                  | 75.2  | 23.9  | 31.8  | 1.9   | 1.36   | 98.0  | 167    | 54    | 40.6     | 2.2   | 30.0     | 3.9   | 0.13    | 0.00 | nd       | nd  |
| 67        | 38   | 6.3                  | 2.15                 | 3.74                 | 0.36                 | 0.0                  | 0.0                  | 4.95                 | 11.9  | 37.3  | 428                  | 75.4  | 24.0  | 31.9  | 1.7   | nd     | 99.0  | 187    | 46    | 46.5     | 0.1   | 23.2     | 1.6   | 0.15    | 0.03 | nd       | nd  |
| 71        | 42   | 7.21                 | 2.47                 | 4.10                 | 0.59                 | 0.0                  | 0.0                  | 4.89                 | 11.8  | 37.0  | 399                  | 75.7  | 24.1  | 31.9  | 2.4   | nd     | 98.4  | 154    | 38    | 40.3     | 2.1   | 25.1     | 5.7   | 0.13    | 0.00 | nd       | nd  |

Baboon Y7

| Age<br>days | Challenge<br>Day<br>days | WBC                           |                              |                               |                             |                               |                              | RBC<br>x10 <sup>6</sup> /μl | HGB<br>g/dL | HCT<br>% | PLT<br>x10 <sup>3</sup> /μl | MCV<br>fl | MCH<br>pg | MCHC<br>% | Retic<br>% | Weigh<br>t<br>kg | Avg<br>Temp<br>°F | Avg<br>HR<br>/min | Avg<br>Resp<br>/min | serum<br>anti-FHA |      | serum<br>anti-PTx |      | serum<br>ADA |      | NPW<br>anti-PTx |     |
|-------------|--------------------------|-------------------------------|------------------------------|-------------------------------|-----------------------------|-------------------------------|------------------------------|-----------------------------|-------------|----------|-----------------------------|-----------|-----------|-----------|------------|------------------|-------------------|-------------------|---------------------|-------------------|------|-------------------|------|--------------|------|-----------------|-----|
|             |                          | Total<br>x10 <sup>3</sup> /μl | Neut<br>x10 <sup>3</sup> /μl | Lymph<br>x10 <sup>3</sup> /μl | Mon<br>x10 <sup>3</sup> /μl | Eosin<br>x10 <sup>3</sup> /μl | Baso<br>x10 <sup>3</sup> /μl |                             |             |          |                             |           |           |           |            |                  |                   |                   |                     | IU/ml             | +/-  | μg/ml             | +/-  | rel<br>abs   | +/-  | ng/ml           | +/- |
| 1           | -32                      | 9.77                          | 8.56                         | 0.62                          | 0.58                        | 0.0                           | 0.0                          | 3.38                        | 10.7        | 34.0     | 263                         | 101.0     | 31.7      | 31.5      | 7.0        | 0.98             | 98.3              | 147               | 68                  | 0.5               | 0.0  | 0.1               | 0.0  | 0.12         | 0.00 | nd              | nd  |
| 7           | -26                      | 7.08                          | 3.83                         | 2.81                          | 0.36                        | 0.06                          | 0.02                         | 3.66                        | 10.8        | 33.6     | 820                         | 91.8      | 29.5      | 32.1      | 2.4        | nd               | nd                | nd                | nd                  | 0.6               | 0.1  | 220.8             | 46.1 | 0.11         | 0.01 | nd              | nd  |
| 14          | -19                      | 6.16                          | 3.44                         | 2.39                          | 0.28                        | 0.02                          | 0.03                         | 4.11                        | 11.5        | 36.1     | 620                         | 87.8      | 28.0      | 31.9      | 2.7        | nd               | nd                | nd                | nd                  | 0.5               | 0.0  | 368.4             | 34.5 | 0.12         | 0.00 | nd              | nd  |
| 21          | -12                      | 6.59                          | 3.19                         | 3.03                          | 0.31                        | 0.04                          | 0.02                         | 4.46                        | 12.1        | 38.0     | 345                         | 85.2      | 27.1      | 31.8      | 3.6        | nd               | nd                | nd                | nd                  | 0.5               | 0.1  | 241.1             | 40.4 | 0.14         | 0.01 | nd              | nd  |
| 28          | -5                       | nd                            | nd                           | nd                            | nd                          | nd                            | nd                           | nd                          | nd          | nd       | nd                          | nd        | nd        | nd        | nd         | nd               | nd                | nd                | nd                  | 0.8               | 0.1  | 180.0             | 12.7 | 0.16         | 0.00 | nd              | nd  |
| 33          | 0                        | 4.14                          | 2.81                         | 1.22                          | 0.10                        | 0.0                           | 0.0                          | 4.68                        | 12.2        | 37.1     | 427                         | 79.3      | 26.1      | 32.9      | 1.8        | 1.20             | 99.9              | 165               | 38                  | 1.1               | 0.1  | 142.6             | 3.6  | 0.18         | 0.01 | nd              | nd  |
| 36          | 3                        | 5.56                          | 2.32                         | 2.82                          | 0.38                        | 0.0                           | 0.0                          | 4.61                        | 11.9        | 36.6     | 358                         | 79.4      | 25.8      | 32.5      | 1.2        | 1.26             | 98.3              | 167               | 100                 | 1.2               | 0.3  | 102.2             | 7.4  | 0.21         | 0.01 | 23.5            | 3.1 |
| 40          | 7                        | 9.46                          | 5.57                         | 3.15                          | 0.69                        | 0.0                           | 0.0                          | 4.66                        | 11.8        | 36.7     | 366                         | 78.8      | 25.3      | 32.2      | 2.5        | 1.29             | 98.4              | 145               | 66                  | 1.4               | 0.1  | 151.1             | 9.9  | 0.23         | 0.00 | nd              | nd  |
| 43          | 10                       | 14.2<br>2                     | 7.69                         | 5.96                          | 0.51                        | 0.1                           | 0.0                          | 4.74                        | 12.0        | 37.5     | 386                         | 79.1      | 25.3      | 32.0      | 2.5        | 1.35             | 99.3              | 213               | 92                  | 1.6               | 0.1  | 149.8             | 28.9 | 0.18         | 0.08 | nd              | nd  |
| 47          | 14                       | 9.37                          | 3.62                         | 5.44                          | 0.28                        | 0.0                           | 0.0                          | 4.79                        | 12.1        | 38.5     | 342                         | 80.4      | 25.3      | 31.4      | 2.2        | 1.41             | 98.4              | 169               | 74                  | 2.3               | 0.1  | 120.9             | 27.1 | 0.20         | 0.06 | nd              | nd  |
| 50          | 17                       | 10.3<br>5                     | 4.77                         | 5.29                          | 0.27                        | 0.0                           | 0.0                          | 4.81                        | 12.3        | 38.6     | 398                         | 80.2      | 25.6      | 31.9      | 2.1        | 1.46             | 98.5              | 186               | 78                  | 4.9               | 0.1  | 88.7              | 3.7  | 0.23         | 0.01 | nd              | nd  |
| 54          | 21                       | 7.05                          | 3.15                         | 3.58                          | 0.29                        | 0.0                           | 0.0                          | 5.08                        | 12.7        | 39.8     | 383                         | 78.3      | 25.0      | 31.9      | 1.5        | 1.49             | 98.7              | 189               | 80                  | 26.5              | 0.2  | 83.4              | 6.6  | 0.25         | 0.00 | nd              | nd  |
| 57          | 24                       | 8.05                          | 5.64                         | 2.00                          | 0.40                        | 0.0                           | 0.0                          | 5.14                        | 12.7        | 40.5     | 378                         | 78.8      | 24.7      | 31.4      | 1.4        | 1.50             | 97.8              | 184               | 66                  | 108.5             | 7.7  | 93.8              | 5.0  | 0.26         | 0.00 | nd              | nd  |
| 61          | 28                       | 7                             | 3.46                         | 3.12                          | 0.35                        | 0.1                           | 0.0                          | 5.20                        | 13.0        | 40.0     | 369                         | 76.9      | 25.0      | 32.5      | 1.4        | 1.51             | 98.2              | 153               | 72                  | 221.7             | 5.9  | 86.6              | 30.6 | 0.28         | 0.00 | nd              | nd  |
| 64          | 31                       | 6.5                           | 2.72                         | 3.44                          | 0.28                        | 0.1                           | 0.0                          | 5.44                        | 13.6        | 42.3     | 414                         | 77.8      | 25.0      | 32.2      | 1.1        | 1.53             | 99.1              | 155               | 76                  | 261.5             | 8.7  | 72.8              | 15.5 | 0.30         | 0.01 | nd              | nd  |
| 68          | 35                       | 9.44                          | 6.77                         | 2.41                          | 0.23                        | 0.0                           | 0.0                          | 5.31                        | 13.2        | 40.9     | 330                         | 77.0      | 24.9      | 32.3      | 0.9        | 1.56             | 99.0              | 177               | 74                  | 302.7             | 6.8  | 56.6              | 8.8  | 0.39         | 0.02 | nd              | nd  |
| 71          | 38                       | 6.03                          | 3.50                         | 2.29                          | 0.21                        | 0.0                           | 0.0                          | 4.92                        | 12.1        | 37.8     | 344                         | 76.8      | 24.6      | 32.0      | 1.0        | 1.59             | 98.7              | 180               | 54                  | 255.2             | 9.6  | 41.5              | 6.2  | 0.40         | 0.02 | nd              | nd  |
| 75          | 42                       | 5.89                          | 3.18                         | 2.45                          | 0.23                        | 0.0                           | 0.0                          | 5.02                        | 12.4        | 38.8     | 342                         | 77.3      | 24.7      | 32.0      | 1.8        | 1.61             | 98.7              | 176               | 66                  | 214.5             | 11.3 | 71.1              | 11.8 | 0.42         | 0.01 | nd              | nd  |
